# Supplementary material for: PRO40 Is a Scaffold Protein of the Cell Wall Integrity Pathway, Linking the MAP Kinase Module to the Upstream Activator Protein Kinase C
Source: PLoS Genet. 2014 Sep 4;10(9):e1004582. doi: 10.1371/journal.pgen.1004582 (PMC4154660; doi:10.1371/journal.pgen.1004582)
Supplement: Table S3 — List of PRO40 interaction partners identified by FLAG affinity purification and mass spectrometry. (XLSX) [file pgen.1004582.s014.xlsx]

## Sheet: Tabelle1
S. macrospora	# spectral counts			S	best hit blastp vs. nr (not self), e-value<e-05
Locus Tag	PRO40_1	PRO40_2	PRO40_3
SMAC_00014	8		7	15	>ref|XP_963313.1| succinyl-CoA ligase beta-chain [Neurospora crassa OR74A]
SMAC_00067	6	3	3	12	>ref|XP_963102.1| hypothetical protein NCU06251 [Neurospora crassa OR74A]
SMAC_00082	4			4	>ref|XP_962868.1| hypothetical protein NCU06264 [Neurospora crassa OR74A]
SMAC_00091			2	2	>ref|XP_962879.1| hypothetical protein NCU06275 [Neurospora crassa OR74A]
SMAC_00094			4	4	>ref|XP_962882.2| hypothetical protein NCU06278 [Neurospora crassa OR74A]
SMAC_00095	14	7	4	25	>ref|XP_962883.1| hypothetical protein NCU06279 [Neurospora crassa OR74A]
SMAC_00109	15	4	15	34	>ref|XP_001907915.1| hypothetical protein [Podospora anserina S mat+]
SMAC_00126	2			2	>ref|XP_957019.2| hypothetical protein NCU00032 [Neurospora crassa OR74A]
SMAC_00131	12	3	6	21	>ref|XP_956151.2| hypothetical protein NCU00040 [Neurospora crassa OR74A]
SMAC_00134	15	4	4	23	>gb|EFQ28562.1| calcineurin-like phosphoesterase [Glomerella graminicola M1.001]
SMAC_00146			3	3	>ref|XP_001908312.1| hypothetical protein [Podospora anserina S mat+]
SMAC_00167	2			2	>ref|XP_001908296.1| hypothetical protein [Podospora anserina S mat+]
SMAC_00176		2	2	4	>ref|XP_959156.1| hypothetical protein NCU09212 [Neurospora crassa OR74A]
SMAC_00193	4			4	>ref|XP_964741.1| aspartyl-tRNA synthetase [Neurospora crassa OR74A]
SMAC_00211	15	6	15	36	>ref|XP_001221133.1| hypothetical protein CHGG_01912 [Chaetomium globosum CBS 148.51]
SMAC_00218	2			2	>gb|ABD92369.1| histone acetyltransferase NGF-1 [Neurospora crassa]
SMAC_00229	6	3	6	15	>ref|XP_965144.2| inorganic pyrophosphatase [Neurospora crassa OR74A]
SMAC_00236			2	2	>ref|XP_965152.1| succinate dehydrogenase iron-sulfur protein, mitochondrial precursor
SMAC_00246	2			2	>ref|XP_965162.1| NADH:ubiquinone oxidoreductase 17.8kD subunit [Neurospora crassa
SMAC_00248	12			12	>ref|XP_965164.1| 40S ribosomal protein S15 [Neurospora crassa OR74A]
SMAC_00256	8			8	>ref|XP_965172.1| 60S acidic ribosomal protein P2 [Neurospora crassa OR74A]
SMAC_00281			4	4	>ref|XP_958649.2| hypothetical protein NCU09882 [Neurospora crassa OR74A]
SMAC_00294			2	2	>ref|XP_958332.1| hypothetical protein NCU07352 [Neurospora crassa OR74A]
SMAC_00307			4	4	>ref|XP_958134.1| hypothetical protein NCU07361 [Neurospora crassa OR74A]
SMAC_00314	42	21	28	91	>ref|XP_957994.2| glucosamine-fructose-6-phosphate aminotransferase [Neurospora
SMAC_00315	7	2	3	12	>ref|XP_958860.2| hypothetical protein NCU07367 [Neurospora crassa OR74A]
SMAC_00329	3		9	12	>ref|XP_958873.1| eukaryotic translation initiation factor 3 [Neurospora crassa
SMAC_00346	3			3	>ref|XP_958483.1| hypothetical protein NCU07399 [Neurospora crassa OR74A]
SMAC_00364	8	3		11	>ref|XP_958415.1| hypothetical protein NCU07414 [Neurospora crassa OR74A]
SMAC_00367	16	5	18	39	>ref|XP_958421.2| eIF4A [Neurospora crassa OR74A]
SMAC_00379	13	7	9	29	>ref|XP_957959.1| enolase [Neurospora crassa OR74A]
SMAC_00384	2		2	4	>ref|XP_959167.1| protein disulfide-isomerase precursor [Neurospora crassa OR74A]
SMAC_00420	2			2	>ref|XP_964043.1| 40S ribosomal protein S13 [Neurospora crassa OR74A]
SMAC_00424	3	2		5	>ref|XP_964047.1| U2 snRNP component prp10 [Neurospora crassa OR74A]
SMAC_00437	4	3		7	>ref|XP_964306.1| ATP synthase subunit 4, mitochondrial precursor [Neurospora crassa
SMAC_00446	2			2	>ref|XP_964317.1| hypothetical protein NCU00513 [Neurospora crassa OR74A]
SMAC_00467			3	3	>ref|XP_965368.1| hypothetical protein NCU02982 [Neurospora crassa OR74A]
SMAC_00496	6		7	13	>ref|XP_965341.1| homoisocitrate dehydrogenase, mitochondrial precursor [Neurospora
SMAC_00501	8	4	15	27	>ref|XP_965630.2| minor allergen Alt a 7 [Neurospora crassa OR74A]
SMAC_00541	10	10		20	>emb|CBI60666.1| unnamed protein product [Sordaria macrospora]
SMAC_00555			2	2	>ref|XP_965581.1| hypothetical protein NCU02899 [Neurospora crassa OR74A]
SMAC_00562			7	7	>ref|XP_002999938.1| 60S ribosomal protein L23 [Verticillium albo-atrum VaMs.102]
SMAC_00604	7		2	9	>ref|XP_964130.1| 26S protease regulatory subunit 7 [Neurospora crassa OR74A]
SMAC_00616	8		19	27	>ref|XP_964471.1| hypothetical protein NCU02815 [Neurospora crassa OR74A]
SMAC_00625	8		11	19	>ref|XP_964462.1| 14-3-3 protein 7 [Neurospora crassa OR74A]
SMAC_00626			4	4	>ref|XP_964463.2| hypothetical protein NCU02807 [Neurospora crassa OR74A]
SMAC_00630	6		11	17	>ref|XP_964466.2| eukaryotic translation initiation factor 2 gamma subunit [Neurospora
SMAC_00633	11	5	17	33	>ref|XP_964469.1| hypothetical protein NCU02813 [Neurospora crassa OR74A]
SMAC_00640	53	57	72	182	No hits found
SMAC_00646	3			3	No hits found
SMAC_00656	2			2	No hits found
SMAC_00690	2			2	>ref|XP_960151.1| hypothetical protein NCU09869 [Neurospora crassa OR74A]
SMAC_00693	2			2	>ref|XP_001227444.1| hypothetical protein CHGG_09517 [Chaetomium globosum CBS 148.51]
SMAC_00695	4		6	10	>ref|XP_960155.1| phosphoenolpyruvate carboxykinase [Neurospora crassa OR74A]
SMAC_00702	29	15	59	103	>ref|XP_960450.1| hypothetical protein NCU05488 [Neurospora crassa OR74A]
SMAC_00708	4			4	>ref|XP_960457.2| hypothetical protein NCU05495 [Neurospora crassa OR74A]
SMAC_00711	2			2	>ref|XP_960460.1| hypothetical protein NCU05498 [Neurospora crassa OR74A]
SMAC_00722	3			3	>ref|XP_960475.1| hypothetical protein NCU05513 [Neurospora crassa OR74A]
SMAC_00737	5	3	11	19	>ref|XP_001905745.1| hypothetical protein [Podospora anserina S mat+]
SMAC_00747			4	4	>ref|XP_962629.1| hypothetical protein NCU06989 [Neurospora crassa OR74A]
SMAC_00759	3			3	>ref|XP_962617.1| hypothetical protein NCU06977 [Neurospora crassa OR74A]
SMAC_00760	75	100	64	239	>ref|XP_962618.1| hypothetical protein NCU06978 [Neurospora crassa OR74A]
SMAC_00761	8	3	2	13	>ref|XP_962616.1| dynein heavy chain [Neurospora crassa OR74A]
SMAC_00772	7			7	>ref|XP_962610.1| ribose-phosphate pyrophosphokinase II [Neurospora crassa OR74A]
SMAC_00774	15	4		19	>ref|XP_962608.1| hypothetical protein NCU06968 [Neurospora crassa OR74A]
SMAC_00799	4		4	8	>ref|XP_962118.1| ubiquitin-conjugating enzyme E2 15 [Neurospora crassa OR74A]
SMAC_00815	5			5	>ref|XP_962134.2| serine/threonine-protein kinase gad8 [Neurospora crassa OR74A]
SMAC_00822			2	2	>ref|XP_962140.1| hypothetical protein NCU07286 [Neurospora crassa OR74A]
SMAC_00823	9	3	5	17	>ref|XP_962141.2| hypothetical protein NCU07287 [Neurospora crassa OR74A]
SMAC_00840	22	10	4	36	>ref|XP_962465.1| fatty acid synthase beta subunit dehydratase [Neurospora crassa
SMAC_00841	21	6	8	35	>ref|XP_962466.1| fatty acid synthase alpha subunit reductase [Neurospora crassa
SMAC_00852	39	9	19	67	>ref|XP_962286.2| elongation factor 2 [Neurospora crassa OR74A]
SMAC_00855	15		6	21	>ref|XP_962283.1| isocitrate dehydrogenase subunit 2, mitochondrial precursor [Neurospora
SMAC_00862	2			2	>ref|XP_961729.1| methylenetetrahydrofolate reductase 1 [Neurospora crassa OR74A]
SMAC_00871		3		3	>ref|XP_001728088.1| hypothetical protein NCU11370 [Neurospora crassa OR74A]
SMAC_00888	3			3	>ref|XP_962304.1| hypothetical protein NCU07662 [Neurospora crassa OR74A]
SMAC_00892		5		5	>ref|XP_962543.1| hypothetical protein NCU08330 [Neurospora crassa OR74A]
SMAC_00900	2			2	>ref|XP_962535.2| hypothetical protein NCU08322 [Neurospora crassa OR74A]
SMAC_00901	6		4	10	>ref|XP_962532.2| developmental regulator flbA [Neurospora crassa OR74A]
SMAC_00930	6			6	>ref|XP_961813.1| protein pyrABCN [Neurospora crassa OR74A]
SMAC_00934			2	2	>ref|XP_961806.1| hypothetical protein NCU08280 [Neurospora crassa OR74A]
SMAC_00938	4	2	6	12	>ref|XP_961905.1| eukaryotic translation initiation factor 2 alpha subunit [Neurospora
SMAC_00943	3			3	>ref|XP_961901.2| hypothetical protein NCU08273 [Neurospora crassa OR74A]
SMAC_00950	6		8	14	>ref|XP_962242.1| GTP-binding protein SAS1 [Neurospora crassa OR74A]
SMAC_00952	5			5	>ref|XP_962240.1| C-4 methylsterol oxidase, variant [Neurospora crassa OR74A]
SMAC_00972	2			2	>ref|XP_962218.2| hypothetical protein NCU06380 [Neurospora crassa OR74A]
SMAC_00989	8	6	7	21	>ref|XP_962395.2| hypothetical protein NCU06361 [Neurospora crassa OR74A]
SMAC_00993	8	3	2	13	>ref|XP_962389.1| hypothetical protein NCU06355 [Neurospora crassa OR74A]
SMAC_01064	12	5	9	26	>ref|XP_962546.1| hypothetical protein NCU06284 [Neurospora crassa OR74A]
SMAC_01077			6	6	>ref|XP_001223515.1| hypothetical protein CHGG_04301 [Chaetomium globosum CBS 148.51]
SMAC_01085	3			3	>ref|XP_957637.1| hypothetical protein NCU04022 [Neurospora crassa OR74A]
SMAC_01089	4		2	6	>ref|XP_956922.1| hypothetical protein NCU04511 [Neurospora crassa OR74A]
SMAC_01126	4	2		6	>ref|XP_957048.1| hypothetical protein NCU04479 [Neurospora crassa OR74A]
SMAC_01145	2		2	4	>ref|XP_957032.1| hypothetical protein NCU11296 [Neurospora crassa OR74A]
SMAC_01158	12	3	10	25	>ref|XP_955907.1| hypothetical protein NCU04449 [Neurospora crassa OR74A]
SMAC_01159	8	2	5	15	>ref|XP_955906.2| T-complex protein 1 subunit alpha [Neurospora crassa OR74A]
SMAC_01165	12	10	24	46	>ref|XP_957520.1| hypothetical protein NCU04443 [Neurospora crassa OR74A]
SMAC_01166			2	2	>ref|XP_957519.1| GAL10 bifunctional protein [Neurospora crassa OR74A]
SMAC_01179		3		3	>ref|XP_957508.1| hypothetical protein NCU04431 [Neurospora crassa OR74A]
SMAC_01191	20	4	13	37	>ref|XP_001258624.1| short chain dehydrogenase (AtsC), putative [Neosartorya fischeri
SMAC_01205	17	21	31	69	>ref|XP_962080.1| hypothetical protein NCU07947 [Neurospora crassa OR74A]
SMAC_01206		3	3	6	>ref|XP_962081.1| hypothetical protein NCU07948 [Neurospora crassa OR74A]
SMAC_01210	2			2	>ref|XP_965396.1| L-aminoadipate-semialdehyde dehydrogenase large subunit [Neurospora
SMAC_01214	6	7	18	31	>ref|XP_965392.1| sterol 24-C-methyltransferase [Neurospora crassa OR74A]
SMAC_01215	8			8	>ref|XP_965390.1| pyruvate dehydrogenase E1 component [Neurospora crassa OR74A]
SMAC_01257		2	3	5	>ref|XP_964727.2| hypothetical protein NCU00566 [Neurospora crassa OR74A]
SMAC_01258	25	8	11	44	>ref|XP_964728.1| arg-6 protein, mitochondrial precursor [Neurospora crassa OR74A]
SMAC_01261			2	2	>ref|XP_965719.1| hypothetical protein NCU00579 [Neurospora crassa OR74A]
SMAC_01265	4		3	7	>ref|XP_964736.1| glucokinase [Neurospora crassa OR74A]
SMAC_01267	11	4	10	25	>ref|XP_964734.2| hypothetical protein NCU00573 [Neurospora crassa OR74A]
SMAC_01284	5	3	2	10	>ref|XP_965733.1| COP9 signalosome complex subunit 2 [Neurospora crassa OR74A]
SMAC_01297			2	2	>ref|XP_965749.1| hypothetical protein NCU00609 [Neurospora crassa OR74A]
SMAC_01299	3		12	15	>ref|XP_965754.1| hypothetical protein NCU00614 [Neurospora crassa OR74A]
SMAC_01314			3	3	>ref|XP_965769.2| 6-phosphofructokinase [Neurospora crassa OR74A]
SMAC_01321	13		3	16	>ref|XP_965776.1| ATP synthase D chain, mitochondrial [Neurospora crassa OR74A]
SMAC_01348			12	12	>ref|XP_965809.1| hypothetical protein NCU00669 [Neurospora crassa OR74A]
SMAC_01351	4		7	11	>dbj|BAF62454.1| subtilisin-like serine protease [Acremonium sp. F11177]
SMAC_01356	2	2	2	6	>ref|XP_965817.1| hypothetical protein NCU00677 [Neurospora crassa OR74A]
SMAC_01363			3	3	>ref|XP_965825.2| casein kinase I isoform delta [Neurospora crassa OR74A]
SMAC_01367	61	23	10	94	>ref|XP_965835.1| hypothetical protein NCU00695 [Neurospora crassa OR74A]
SMAC_01405			5	5	>ref|XP_001220522.1| hypothetical protein CHGG_01301 [Chaetomium globosum CBS 148.51]
SMAC_01412		6		6	>ref|XP_964554.1| hypothetical protein NCU00720 [Neurospora crassa OR74A]
SMAC_01427			2	2	>ref|XP_964395.2| glycerol-3-phosphate dehydrogenase [Neurospora crassa OR74A]
SMAC_01440			2	2	>ref|XP_964154.1| hypothetical protein NCU00757 [Neurospora crassa OR74A]
SMAC_01453	2		4	6	>ref|XP_964924.1| hypothetical protein NCU00768 [Neurospora crassa OR74A]
SMAC_01458	12	4	14	30	>ref|XP_964931.2| isocitrate dehydrogenase subunit 1, mitochondrial precursor [Neurospora
SMAC_01459	6		3	9	>sp|P00440.5|TYRO_NEUCR RecName: Full=Tyrosinase; AltName: Full=Monophenol monooxygenase;
SMAC_01474	13	5	10	28	>ref|XP_964949.2| hypothetical protein NCU00793 [Neurospora crassa OR74A]
SMAC_01480	6	2	9	17	>ref|XP_963801.1| hypothetical protein NCU00801 [Neurospora crassa OR74A]
SMAC_01502	6		5	11	>ref|XP_964366.2| 26S proteasome regulatory subunit [Neurospora crassa OR74A]
SMAC_01503	2			2	>ref|XP_964367.1| histone deacetylase RPD3 [Neurospora crassa OR74A]
SMAC_01514			2	2	>ref|XP_963701.1| hypothetical protein NCU00835 [Neurospora crassa OR74A]
SMAC_01557	3		2	5	>ref|XP_964783.2| hypothetical protein NCU00867 [Neurospora crassa OR74A]
SMAC_01567	16	3	11	30	>ref|XP_964796.2| hypothetical protein NCU00880 [Neurospora crassa OR74A]
SMAC_01576	2		5	7	>ref|XP_964806.1| hypothetical protein NCU00890 [Neurospora crassa OR74A]
SMAC_01577			2	2	>ref|XP_964807.1| hypothetical protein NCU00891 [Neurospora crassa OR74A]
SMAC_01583	4		2	6	>ref|XP_964812.1| hypothetical protein NCU00896 [Neurospora crassa OR74A]
SMAC_01589	3			3	>ref|XP_959146.2| hypothetical protein NCU09202 [Neurospora crassa OR74A]
SMAC_01601	7	8	23	38	>ref|XP_963707.1| hypothetical protein NCU08332 [Neurospora crassa OR74A]
SMAC_01603	17	2	2	21	>ref|XP_965237.1| hypothetical protein NCU08334 [Neurospora crassa OR74A]
SMAC_01605	12	3	14	29	>ref|XP_001728186.1| succinate dehydrogenase flavoprotein subunit, mitochondrial precursor
SMAC_01609	13	2	12	27	>ref|XP_965243.1| ADP-ribosylation factor 1 [Neurospora crassa OR74A]
SMAC_01613	7			7	>ref|XP_965247.1| 60S ribosomal protein L31 [Neurospora crassa OR74A]
SMAC_01624	2		4	6	>ref|XP_001728187.1| hypothetical protein NCU11325 [Neurospora crassa OR74A]
SMAC_01628	8			8	>ref|XP_965259.1| hypothetical protein NCU08356 [Neurospora crassa OR74A]
SMAC_01630	2		2	4	>ref|XP_965261.1| hypothetical protein NCU08358 [Neurospora crassa OR74A]
SMAC_01661	28	16	8	52	>ref|XP_957888.2| hypothetical protein NCU09931 [Neurospora crassa OR74A]
SMAC_01691	4	2		6	>ref|XP_962070.1| NADH:ubiquinone oxidoreductase 29.9kD subunit [Neurospora crassa
SMAC_01701	5			5	>ref|XP_962059.1| rab GDP-dissociation inhibitor [Neurospora crassa OR74A]
SMAC_01710	3			3	>ref|XP_961915.1| cytochrome P450 61 [Neurospora crassa OR74A]
SMAC_01714	6	7		13	>ref|XP_961911.2| eukaryotic translation initiation factor 5A [Neurospora crassa
SMAC_01724			2	2	>ref|XP_961756.1| hypothetical protein NCU05266 [Neurospora crassa OR74A]
SMAC_01730	8		2	10	>ref|XP_961826.1| ATP-dependent protease La [Neurospora crassa OR74A]
SMAC_01739	4			4	>ref|XP_961791.1| ribose-phosphate pyrophosphokinase [Neurospora crassa OR74A]
SMAC_01756			6	6	>ref|XP_957465.1| phosphatidylglycerol/phosphatidylinositol transfer protein precursor
SMAC_01764	41	36	31	108	>ref|XP_957457.1| hypothetical protein NCU04380 [Neurospora crassa OR74A]
SMAC_01774	4		4	8	>ref|XP_956143.1| ubiquitin-activating enzyme E1 1 [Neurospora crassa OR74A]
SMAC_01794	5		2	7	>ref|XP_001728545.1| hypothetical protein NCU11050 [Neurospora crassa OR74A]
SMAC_01799	4	3		7	>ref|XP_956331.2| chitin synthase 6 [Neurospora crassa OR74A]
SMAC_01800	2	2	3	7	>ref|XP_956333.2| hypothetical protein NCU04352 [Neurospora crassa OR74A]
SMAC_01802	4		3	7	>ref|XP_956330.1| hypothetical protein NCU04349 [Neurospora crassa OR74A]
SMAC_01814	6			6	>ref|XP_962652.2| acetolactate synthase, mitochondrial precursor [Neurospora crassa
SMAC_01835	5		3	8	>ref|XP_962671.1| vacuolar protein-sorting protein BRO1 [Neurospora crassa OR74A]
SMAC_01836	2			2	>ref|XP_962670.1| cutinase transcription factor 1 alpha [Neurospora crassa OR74A]
SMAC_01839	15	5	3	23	>ref|XP_962667.1| hypothetical protein NCU07997 [Neurospora crassa OR74A]
SMAC_01844			4	4	>ref|XP_962673.1| hypothetical protein NCU08003 [Neurospora crassa OR74A]
SMAC_01847			10	10	>emb|CAE85521.1| related to adenylate cyclase-associated protein, 70K [Neurospora
SMAC_01862	7		5	12	>emb|CAB51808.1| Spo76 protein [Sordaria macrospora]
SMAC_01876	2		5	7	>ref|XP_956704.2| guanine nucleotide-binding protein beta subunit [Neurospora crassa
SMAC_01891	3			3	>ref|XP_956775.2| hypothetical protein NCU00456 [Neurospora crassa OR74A]
SMAC_01896	6		3	9	>ref|XP_956780.1| NAD-specific glutamate dehydrogenase [Neurospora crassa OR74A]
SMAC_01898	9		6	15	>sp|Q7RXY1.1|RL32_NEUCR RecName: Full=60S ribosomal protein L32
SMAC_01899	3		2	5	>ref|XP_956784.1| hypothetical protein NCU00465 [Neurospora crassa OR74A]
SMAC_01901	2			2	>ref|XP_956786.1| COP9 signalosome complex subunit 5 [Neurospora crassa OR74A]
SMAC_01909	7			7	>ref|XP_956794.2| 40S ribosomal protein S18 [Neurospora crassa OR74A]
SMAC_01911	2		7	9	>ref|XP_956796.1| carboxypeptidase Y precursor [Neurospora crassa OR74A]
SMAC_01919	21	19	17	57	>ref|XP_001728513.1| protein phosphatase PP2A regulatory subunit A [Neurospora crassa
SMAC_01921	15	4	3	22	>ref|XP_956174.2| cytoplasmic ribosomal protein subunit S3 [Neurospora crassa OR74A]
SMAC_01924	11	10		21	>ref|XP_956178.1| hypothetical protein NCU00493 [Neurospora crassa OR74A]
SMAC_01930	3			3	>ref|XP_959001.2| hypothetical protein NCU08973 [Neurospora crassa OR74A]
SMAC_01942	5		4	9	>ref|XP_959016.1| hypothetical protein NCU08988 [Neurospora crassa OR74A]
SMAC_01952	13		7	20	>ref|XP_959025.1| repressible alkaline phosphatase precursor [Neurospora crassa
SMAC_01953			2	2	>ref|XP_959026.2| 4-aminobutyrate aminotransferase [Neurospora crassa OR74A]
SMAC_01957	2			2	>ref|XP_959030.1| NADH:ubiquinone oxidoreductase 10.6kD subunit [Neurospora crassa
SMAC_01988	7	3	10	20	>ref|XP_958612.1| T-complex protein 1 subunit theta [Neurospora crassa OR74A]
SMAC_01992			2	2	>ref|XP_958607.2| 60S ribosomal protein L43 [Neurospora crassa OR74A]
SMAC_02000		2		2	>ref|XP_958601.1| hypothetical protein NCU07556 [Neurospora crassa OR74A]
SMAC_02037	3			3	>ref|XP_962794.1| hypothetical protein NCU05680 [Neurospora crassa OR74A]
SMAC_02046	5			5	>ref|XP_963051.1| cytochrome c oxidase polypeptide IV, mitochondrial precursor
SMAC_02072	2			2	>ref|XP_963068.2| hypothetical protein NCU05706 [Neurospora crassa OR74A]
SMAC_02092	7	3	3	13	>ref|XP_962936.1| hypothetical protein NCU07815 [Neurospora crassa OR74A]
SMAC_02101	3			3	>ref|XP_962944.1| scytalone dehydratase [Neurospora crassa OR74A]
SMAC_02105	4			4	>ref|XP_962947.1| 40S ribosomal protein S19 [Neurospora crassa OR74A]
SMAC_02108	3			3	>ref|XP_962950.2| 60S ribosomal protein L7 [Neurospora crassa OR74A]
SMAC_02109	2		2	4	>ref|XP_962951.1| 40S ribosomal protein S14 [Neurospora crassa OR74A]
SMAC_02110	18	14	26	58	>ref|XP_962952.1| eukaryotic translation initiation factor 3 [Neurospora crassa
SMAC_02111	5			5	>ref|XP_962953.1| pre-mRNA processing splicing factor 8 [Neurospora crassa OR74A]
SMAC_02120	3			3	>ref|XP_963103.1| hypothetical protein NCU07842 [Neurospora crassa OR74A]
SMAC_02123	4			4	>dbj|BAA21049.1| thiamine-4 [Neurospora crassa]
SMAC_02131	4			4	>ref|XP_963118.1| 60S ribosomal protein L34 [Neurospora crassa OR74A]
SMAC_02133	4	2		6	>ref|XP_963120.1| hypothetical protein NCU07859 [Neurospora crassa OR74A]
SMAC_02142	4		7	11	>ref|XP_963129.1| hypothetical protein NCU07868 [Neurospora crassa OR74A]
SMAC_02147	8		3	11	>ref|XP_962723.2| hypothetical protein NCU07874 [Neurospora crassa OR74A]
SMAC_02172			3	3	>ref|XP_955952.1| Rab5-like protein ypt51 [Neurospora crassa OR74A]
SMAC_02183	9	4	4	17	>ref|XP_957310.2| MAP kinase kinase [Neurospora crassa OR74A]
SMAC_02191		2	2	4	>ref|XP_957320.1| hypothetical protein NCU06429 [Neurospora crassa OR74A]
SMAC_02193	8	5		13	>ref|XP_001908384.1| hypothetical protein [Podospora anserina S mat+]
SMAC_02218	6	4	6	16	>ref|XP_957348.1| asparaginyl-tRNA synthetase [Neurospora crassa OR74A]
SMAC_02227	5			5	>ref|XP_956587.1| hypothetical protein NCU00202 [Neurospora crassa OR74A]
SMAC_02230	4			4	>ref|XP_956584.1| hypothetical protein NCU00199 [Neurospora crassa OR74A]
SMAC_02251	4			4	No hits found
SMAC_02255	5	4	9	18	No hits found
SMAC_02261	5		2	7	No hits found
SMAC_02293	5	4	13	22	>ref|XP_956183.1| beta-glucosidase [Neurospora crassa OR74A]
SMAC_02296			3	3	>ref|XP_956187.2| hypothetical protein NCU11169 [Neurospora crassa OR74A]
SMAC_02300	3			3	>ref|XP_956242.2| hypothetical protein NCU01539 [Neurospora crassa OR74A]
SMAC_02305	4			4	>ref|XP_956248.1| hypothetical protein NCU01545 [Neurospora crassa OR74A]
SMAC_02307	15	6	19	40	>ref|XP_956250.1| 26S proteasome regulatory subunit RPN8 [Neurospora crassa OR74A]
SMAC_02337			2	2	>emb|CAB91379.2| probable heat-shock protein hsp60 [Neurospora crassa]
SMAC_02340	4	2	4	10	>ref|XP_956507.1| hypothetical protein NCU01596 [Neurospora crassa OR74A]
SMAC_02347	5		19	24	>ref|XP_956517.1| hypothetical protein NCU01606 [Neurospora crassa OR74A]
SMAC_02362	2		5	7	>ref|XP_956004.2| hypothetical protein NCU01636 [Neurospora crassa OR74A]
SMAC_02366	5			5	>sp|D1ZA70.1|ARO1_SORMK RecName: Full=Pentafunctional AROM polypeptide; Includes: RecName:
SMAC_02368	5			5	>emb|CAD21515.1| related to NEUROFIBROMIN [Neurospora crassa]
SMAC_02375			2	2	>ref|XP_956270.2| dolichyl-phosphate-mannose-protein mannosyltransferase 2 [Neurospora
SMAC_02381	4	4	10	18	>emb|CAB99181.1| related to long-chain-fatty-acid--CoA ligase FAA2 [Neurospora
SMAC_02388	4		5	9	>ref|XP_956872.1| acetolactate synthase small subunit, mitochondrial precursor
SMAC_02395	4		6	10	>ref|XP_956880.2| hypothetical protein NCU01674 [Neurospora crassa OR74A]
SMAC_02399	19	11	7	37	>ref|XP_956886.1| H+-transporting ATPase [Neurospora crassa OR74A]
SMAC_02400	3			3	>ref|XP_956895.1| hypothetical protein NCU01689 [Neurospora crassa OR74A]
SMAC_02401		3		3	>ref|XP_956898.1| citrate synthase, mitochondrial precursor [Neurospora crassa
SMAC_02409			5	5	>ref|XP_956908.1| hypothetical protein NCU01702 [Neurospora crassa OR74A]
SMAC_02411			2	2	>ref|XP_956910.1| hypothetical protein NCU01704 [Neurospora crassa OR74A]
SMAC_02421	801	683	1014	2498	>emb|CAB92645.2| related to 6-phosphofructo-2-kinase [Neurospora crassa]
SMAC_02434	3			3	>ref|XP_957170.1| hypothetical protein NCU01747 [Neurospora crassa OR74A]
SMAC_02441	5		4	9	>ref|XP_957179.2| hypothetical protein NCU01756 [Neurospora crassa OR74A]
SMAC_02442	25	14	69	108	>ref|XP_957177.1| alcohol dehydrogenase I [Neurospora crassa OR74A]
SMAC_02450			4	4	>sp|P24918.2|NDUS1_NEUCR RecName: Full=NADH-ubiquinone oxidoreductase 78 kDa subunit,
SMAC_02453			7	7	>emb|CAB91226.1| conserved hypothetical protein [Neurospora crassa]
SMAC_02458	5	2		7	>ref|XP_957199.1| 60S ribosomal protein L15 [Neurospora crassa OR74A]
SMAC_02502	32	10	16	58	>ref|XP_955917.2| exportin-1 [Neurospora crassa OR74A]
SMAC_02505			6	6	>ref|XP_955919.1| hypothetical protein NCU01822 [Neurospora crassa OR74A]
SMAC_02507	6		4	10	>ref|XP_956608.1| hypothetical protein NCU01824 [Neurospora crassa OR74A]
SMAC_02509	11	4	10	25	>ref|XP_956611.1| 60S ribosomal protein L27 [Neurospora crassa OR74A]
SMAC_02519	4	6	4	14	>ref|XP_956627.2| T-complex protein 1 subunit gamma [Neurospora crassa OR74A]
SMAC_02525			2	2	>ref|XP_961375.1| hypothetical protein NCU03648 [Neurospora crassa OR74A]
SMAC_02537	4		3	7	>ref|XP_960742.1| hypothetical protein NCU03662 [Neurospora crassa OR74A]
SMAC_02551	8	6	6	20	>ref|XP_961466.1| hypothetical protein NCU03690 [Neurospora crassa OR74A]
SMAC_02562	7			7	>ref|XP_961479.2| 60S ribosomal protein L17 [Neurospora crassa OR74A]
SMAC_02569			2	2	>ref|XP_961487.1| GTP-binding protein YPTC5 [Neurospora crassa OR74A]
SMAC_02571	4			4	>ref|XP_961489.1| guanosine-diphosphatase [Neurospora crassa OR74A]
SMAC_02580	2			2	>emb|CAF28886.1| pro22 [Sordaria macrospora]
SMAC_02584	6			6	>emb|CAC28839.1| conserved hypothetical protein [Neurospora crassa]
SMAC_02588	8		4	12	>ref|XP_961513.1| elongation factor Tu, mitochondrial precursor [Neurospora crassa
SMAC_02589			2	2	>ref|XP_961515.1| protein disulfide-isomerase tigA precursor [Neurospora crassa
SMAC_02597			2	2	>ref|XP_961096.2| hypothetical protein NCU03749 [Neurospora crassa OR74A]
SMAC_02606	18		6	24	>ref|XP_961104.1| 60S ribosomal protein L4-A [Neurospora crassa OR74A]
SMAC_02615			3	3	>emb|CAC28658.1| related to WERNER SYNDROME HELICASE [Neurospora crassa]
SMAC_02626	10	6	21	37	>emb|CAC28819.1| probable glycerone kinase isoform [Neurospora crassa]
SMAC_02633	13	5	6	24	>emb|CAC28812.1| related to B56-delta regulatory subunit of protein phosphatase
SMAC_02643	5			5	>ref|XP_961186.2| hypothetical protein NCU03797 [Neurospora crassa OR74A]
SMAC_02647			3	3	>ref|XP_961190.2| hypothetical protein NCU03801 [Neurospora crassa OR74A]
SMAC_02648	11	3	9	23	>sp|Q05681.2|PP2B_NEUCR RecName: Full=Serine/threonine-protein phosphatase 2B catalytic
SMAC_02651	8		4	12	>ref|XP_961195.2| 60S ribosomal protein L28 [Neurospora crassa OR74A]
SMAC_02657	7			7	>ref|XP_961202.1| formate dehydrogenase [Neurospora crassa OR74A]
SMAC_02671	41	9	34	84	>ref|XP_961215.1| elongation factor 1-gamma [Neurospora crassa OR74A]
SMAC_02690	10	3		13	>ref|XP_961614.1| hypothetical protein NCU11274 [Neurospora crassa OR74A]
SMAC_02692	8	2	2	12	>ref|XP_961616.1| hypothetical protein NCU11273 [Neurospora crassa OR74A]
SMAC_02708	7	3	7	17	>ref|XP_961633.1| hypothetical protein NCU01021 [Neurospora crassa OR74A]
SMAC_02724			4	4	>ref|XP_961658.1| hypothetical protein NCU01046 [Neurospora crassa OR74A]
SMAC_02792	10		4	14	>ref|XP_963869.2| hypothetical protein NCU03061 [Neurospora crassa OR74A]
SMAC_02801	5			5	>ref|XP_964164.1| hypothetical protein NCU03071 [Neurospora crassa OR74A]
SMAC_02832	8	3	9	20	>ref|XP_964959.1| 6-phosphogluconate dehydrogenase [Neurospora crassa OR74A]
SMAC_02833	2		2	4	>ref|XP_964960.1| hypothetical protein NCU03101 [Neurospora crassa OR74A]
SMAC_02840	5	4	15	24	>ref|XP_964967.2| hypothetical protein NCU03108 [Neurospora crassa OR74A]
SMAC_02851	2			2	>ref|XP_964980.1| hypothetical protein NCU03121 [Neurospora crassa OR74A]
SMAC_02854	3			3	>ref|XP_964983.2| casein kinase II [Neurospora crassa OR74A]
SMAC_02856	19	10	17	46	>ref|XP_964984.1| hypothetical protein NCU03125 [Neurospora crassa OR74A]
SMAC_02870	4			4	>ref|XP_964188.1| histidine biosynthesis trifunctional protein [Neurospora crassa
SMAC_02905			4	4	>emb|CAE76527.1| hypothetical protein [Neurospora crassa]
SMAC_02909			2	2	>ref|XP_965288.1| hypothetical protein NCU03188 [Neurospora crassa OR74A]
SMAC_02921	3			3	>ref|XP_965300.1| serine/threonine-protein kinase sck1 [Neurospora crassa OR74A]
SMAC_02942			6	6	>ref|XP_001728373.1| hypothetical protein NCU11249 [Neurospora crassa OR74A]
SMAC_02949	3		4	7	>ref|XP_965329.1| hypothetical protein NCU03229 [Neurospora crassa OR74A]
SMAC_02977			2	2	>ref|XP_964411.2| hypothetical protein NCU03258 [Neurospora crassa OR74A]
SMAC_02980	3			3	>ref|XP_964416.2| hypothetical protein NCU03263 [Neurospora crassa OR74A]
SMAC_03000	4			4	>ref|XP_964213.1| hypothetical protein NCU03287 [Neurospora crassa OR74A]
SMAC_03001	2	2		4	>ref|XP_964214.2| hypothetical protein NCU03288 [Neurospora crassa OR74A]
SMAC_03012			3	3	>ref|XP_962478.1| hypothetical protein NCU07320 [Neurospora crassa OR74A]
SMAC_03013	12	5	23	40	>ref|XP_962477.1| coatomer beta' subunit [Neurospora crassa OR74A]
SMAC_03026			5	5	>ref|XP_962452.1| hypothetical protein NCU11379 [Neurospora crassa OR74A]
SMAC_03033	4		4	8	>ref|XP_962445.1| eukaryotic translation initiation factor 3 subunit 3 [Neurospora
SMAC_03037			2	2	>ref|XP_962441.1| hypothetical protein NCU07925 [Neurospora crassa OR74A]
SMAC_03040	61	28	45	134	>ref|XP_962438.1| elongation factor 3 [Neurospora crassa OR74A]
SMAC_03046	7		3	10	>ref|XP_962432.1| hypothetical protein NCU07916 [Neurospora crassa OR74A]
SMAC_03048	12	7	8	27	>ref|XP_962430.1| hypothetical protein NCU07914 [Neurospora crassa OR74A]
SMAC_03063	15	7	12	34	>ref|XP_961783.1| hypothetical protein NCU07894 [Neurospora crassa OR74A]
SMAC_03076	5		3	8	>ref|XP_961775.1| hypothetical protein NCU06518 [Neurospora crassa OR74A]
SMAC_03088	4			4	>ref|XP_961364.2| hypothetical protein NCU03637 [Neurospora crassa OR74A]
SMAC_03109	66	39	22	127	>ref|XP_961338.2| chitin synthase 1 [Neurospora crassa OR74A]
SMAC_03111	10	6	21	37	>ref|XP_961335.1| ketol-acid reductoisomerase, mitochondrial precursor [Neurospora
SMAC_03122	2			2	>ref|XP_960635.1| hypothetical protein NCU03591 [Neurospora crassa OR74A]
SMAC_03130	2			2	>emb|CAM35471.1| polyketide synthase [Sordaria macrospora]
SMAC_03136	3	2		5	>emb|CAD70763.1| related to 5-oxoprolinase [Neurospora crassa]
SMAC_03192	3		5	8	>ref|XP_961025.2| hypothetical protein NCU01118 [Neurospora crassa OR74A]
SMAC_03217			3	3	>ref|XP_961053.1| hypothetical protein NCU01146 [Neurospora crassa OR74A]
SMAC_03227	8		6	14	>ref|XP_961526.1| hypothetical protein NCU01160 [Neurospora crassa OR74A]
SMAC_03232			5	5	>ref|XP_961531.1| hypothetical protein NCU01165 [Neurospora crassa OR74A]
SMAC_03236	3		4	7	>ref|XP_001728306.1| hypothetical protein NCU10360 [Neurospora crassa OR74A]
SMAC_03238			10	10	>ref|XP_961536.1| hypothetical protein NCU01170 [Neurospora crassa OR74A]
SMAC_03239	3			3	>ref|XP_961537.1| DNA replication licensing factor mcm5 [Neurospora crassa OR74A]
SMAC_03254	3			3	>ref|XP_960496.1| hypothetical protein NCU05534 [Neurospora crassa OR74A]
SMAC_03255	2		2	4	>ref|XP_960497.1| hypothetical protein NCU05535 [Neurospora crassa OR74A]
SMAC_03273	3	2	6	11	>ref|XP_960515.2| hypothetical protein NCU05553 [Neurospora crassa OR74A]
SMAC_03312	4			4	>ref|XP_960561.1| 40S ribosomal protein S28 [Neurospora crassa OR74A]
SMAC_03320			2	2	>ref|XP_960568.1| hypothetical protein NCU05606 [Neurospora crassa OR74A]
SMAC_03322	3	3		6	>ref|XP_960570.1| phosphatidylinositol 3-kinase tor2 [Neurospora crassa OR74A]
SMAC_03371	8	5	3	16	>ref|XP_001227411.1| hypothetical protein CHGG_09484 [Chaetomium globosum CBS 148.51]
SMAC_03402	7			7	>ref|XP_960299.1| hypothetical protein NCU04766 [Neurospora crassa OR74A]
SMAC_03419	10			10	>ref|XP_960228.1| 60S ribosomal protein L8 [Neurospora crassa OR74A]
SMAC_03420	5		3	8	>emb|CAT00780.1| beta class carbonic anhydrase [Sordaria macrospora]
SMAC_03433	4	2	7	13	>ref|XP_960423.1| fructose-1,6-bisphosphatase [Neurospora crassa OR74A]
SMAC_03438	3			3	>ref|XP_960428.1| hypothetical protein NCU04802 [Neurospora crassa OR74A]
SMAC_03445	9		3	12	>ref|XP_960425.1| polyadenylate-binding protein [Neurospora crassa OR74A]
SMAC_03480	3	2	4	9	>ref|XP_960409.1| hypothetical protein NCU04850 [Neurospora crassa OR74A]
SMAC_03492	11	11	9	31	>gb|AAK25816.1|AF348490_1 MAP kinase [Neurospora crassa]
SMAC_03493	5	4	7	16	>ref|XP_959711.1| hypothetical protein NCU02391 [Neurospora crassa OR74A]
SMAC_03501	3			3	>ref|XP_001728360.1| hypothetical protein NCU10747 [Neurospora crassa OR74A]
SMAC_03510	20	4	3	27	>ref|XP_959795.1| hypothetical protein NCU02374 [Neurospora crassa OR74A]
SMAC_03511	6	3		9	>sp|P25284.2|NDUA9_NEUCR RecName: Full=NADH-ubiquinone oxidoreductase 40 kDa subunit,
SMAC_03518	6		2	8	>ref|XP_959787.1| hypothetical protein NCU02366 [Neurospora crassa OR74A]
SMAC_03526	25	13	11	49	>ref|XP_959778.1| hypothetical protein NCU02357 [Neurospora crassa OR74A]
SMAC_03535	23	2	9	34	>ref|XP_957881.1| hypothetical protein NCU10066 [Neurospora crassa OR74A]
SMAC_03554			4	4	>ref|XP_959762.1| hypothetical protein NCU02336 [Neurospora crassa OR74A]
SMAC_03624	2			2	>ref|XP_959667.2| hypothetical protein NCU08124 [Neurospora crassa OR74A]
SMAC_03633	5		3	8	>ref|XP_959587.1| pyruvate decarboxylase [Neurospora crassa OR74A]
SMAC_03644	2			2	>ref|XP_959521.1| hypothetical protein NCU02202 [Neurospora crassa OR74A]
SMAC_03648	5		6	11	>ref|XP_959526.1| T-complex protein 1 subunit beta [Neurospora crassa OR74A]
SMAC_03649	7		4	11	>ref|XP_959527.1| eukaryotic translation initiation factor 3 [Neurospora crassa
SMAC_03664	6	3	13	22	>ref|XP_959637.1| hypothetical protein NCU02224 [Neurospora crassa OR74A]
SMAC_03674			2	2	>ref|XP_959494.1| hypothetical protein NCU02235 [Neurospora crassa OR74A]
SMAC_03700	15	2	10	27	>ref|XP_959904.1| 26S protease regulatory subunit 6B [Neurospora crassa OR74A]
SMAC_03703	8		5	13	>ref|XP_959907.1| Sec14 cytosolic factor [Neurospora crassa OR74A]
SMAC_03712			5	5	>ref|XP_959917.1| vacuolar protease A precursor [Neurospora crassa OR74A]
SMAC_03738			3	3	>ref|XP_961949.1| hypothetical protein NCU08648 [Neurospora crassa OR74A]
SMAC_03749	3			3	>ref|XP_961964.1| hypothetical protein NCU08663 [Neurospora crassa OR74A]
SMAC_03762	2			2	>ref|XP_962026.1| hypothetical protein NCU08677 [Neurospora crassa OR74A]
SMAC_03769	3			3	>ref|XP_962034.1| phosphoribosylformylglycinamidine synthase [Neurospora crassa
SMAC_03772	3			3	>ref|XP_961766.2| hypothetical protein NCU08687 [Neurospora crassa OR74A]
SMAC_03781	28	4	18	50	>ref|XP_961753.2| heat shock 70 kDa protein, mitochondrial precursor [Neurospora
SMAC_03788	28	6	3	37	>sp|D1ZIW5.1|CHO2_SORMK RecName: Full=Phosphatidylethanolamine N-methyltransferase; Short=PEAMT
SMAC_03808			2	2	>emb|CAE85509.1| probable ANP1 protein [Neurospora crassa]
SMAC_03809			2	2	>emb|CAE85510.1| conserved hypothetical protein [Neurospora crassa]
SMAC_03857	6			6	>ref|XP_959355.2| hypothetical protein NCU04907 [Neurospora crassa OR74A]
SMAC_03885	2		2	4	>ref|XP_960148.1| hypothetical protein NCU07059 [Neurospora crassa OR74A]
SMAC_03922			2	2	>ref|XP_961585.1| glutaredoxin [Neurospora crassa OR74A]
SMAC_03926	8	3	3	14	>ref|XP_961590.2| 26S protease regulatory subunit 4 [Neurospora crassa OR74A]
SMAC_03934	9		2	11	>ref|XP_961600.1| eukaryotic initiation factor 4A-12 [Neurospora crassa OR74A]
SMAC_03939	5		3	8	>ref|XP_961606.1| hypothetical protein NCU01240 [Neurospora crassa OR74A]
SMAC_03947			5	5	>emb|CAC28644.1| related to nuclear protein SA-1 [Neurospora crassa]
SMAC_03949	5		6	11	>ref|XP_960652.1| importin alpha subunit [Neurospora crassa OR74A]
SMAC_03975	2		3	5	>emb|CAE76114.1| putative protein [Neurospora crassa]
SMAC_04008	4	2	6	12	>sp|Q9C284.1|SEC23_NEUCR RecName: Full=Protein transport protein sec-23
SMAC_04018	4			4	>ref|XP_961414.2| transketolase [Neurospora crassa OR74A]
SMAC_04020	4	2		6	>ref|XP_961416.1| hypothetical protein NCU01330 [Neurospora crassa OR74A]
SMAC_04066	2			2	>emb|CAC18279.2| related to the component Tra1 of the SAGA complex [Neurospora
SMAC_04077	11	2		13	>emb|CAD37036.1| related to ubiquitin fusion degradation protein 2 [Neurospora
SMAC_04085			7	7	>ref|XP_956456.1| hypothetical protein NCU03347 [Neurospora crassa OR74A]
SMAC_04114	4	2	4	10	>ref|XP_963336.1| hypothetical protein NCU05345 [Neurospora crassa OR74A]
SMAC_04125	16	3	3	22	>ref|XP_963354.1| 26S protease regulatory subunit 8 [Neurospora crassa OR74A]
SMAC_04128			2	2	>ref|XP_963188.1| hypothetical protein NCU05375 [Neurospora crassa OR74A]
SMAC_04143			5	5	>ref|XP_963478.1| mitochondrial phosphate carrier protein [Neurospora crassa OR74A]
SMAC_04160	2			2	>ref|XP_963248.2| 2-oxoglutarate dehydrogenase E1 component, mitochondrial precursor
SMAC_04163	2			2	>ref|XP_963252.2| 1,4-alpha-glucan branching enzyme [Neurospora crassa OR74A]
SMAC_04164	41	22	41	104	>ref|XP_963253.2| ATP synthase beta chain, mitochondrial precursor [Neurospora
SMAC_04172	5	2	9	16	>ref|XP_963448.1| cytochrome c oxidase subunit V [Neurospora crassa OR74A]
SMAC_04189			5	5	>ref|XP_963328.1| hypothetical protein NCU06854 [Neurospora crassa OR74A]
SMAC_04198	13	2		15	>ref|XP_963317.2| 60S ribosomal protein L3 [Neurospora crassa OR74A]
SMAC_04199	2			2	>ref|XP_963316.1| hypothetical protein NCU06842 [Neurospora crassa OR74A]
SMAC_04207	4		6	10	>ref|XP_963677.2| acetyl-coenzyme A synthetase [Neurospora crassa OR74A]
SMAC_04221	8		7	15	>ref|XP_963704.1| phosphoglucomutase 2 [Neurospora crassa OR74A]
SMAC_04223	2			2	>sp|Q7S045.1|NHP6_NEUCR RecName: Full=Non-histone chromosomal protein 6
SMAC_04234	16	2	10	28	>ref|XP_963777.1| hypothetical protein NCU09367 [Neurospora crassa OR74A]
SMAC_04241	5		4	9	>gb|AAD15987.1| protein phosphatase 2A regulatory B subunit [Neurospora crassa]
SMAC_04272	13	4	15	32	>ref|XP_965131.1| hypothetical protein NCU02746 [Neurospora crassa OR74A]
SMAC_04274	29	10	26	65	>ref|XP_965129.1| 60S ribosomal protein L9 [Neurospora crassa OR74A]
SMAC_04275	2			2	>ref|XP_965128.2| vacuolar protein sorting 26 [Neurospora crassa OR74A]
SMAC_04276	3			3	>ref|XP_965127.1| hypothetical protein NCU02742 [Neurospora crassa OR74A]
SMAC_04284	2		3	5	>ref|XP_965119.1| hypothetical protein NCU02734 [Neurospora crassa OR74A]
SMAC_04299			4	4	>ref|XP_965103.2| hypothetical protein NCU02718 [Neurospora crassa OR74A]
SMAC_04308	5	3	6	14	>ref|XP_965423.1| hypothetical protein NCU02650 [Neurospora crassa OR74A]
SMAC_04316	25	14	19	58	>ref|XP_965430.1| S-adenosylmethionine synthetase [Neurospora crassa OR74A]
SMAC_04327	4		6	10	>ref|XP_965442.1| hypothetical protein NCU02669 [Neurospora crassa OR74A]
SMAC_04342	2			2	>ref|XP_965458.1| hypothetical protein NCU02685 [Neurospora crassa OR74A]
SMAC_04349	3			3	>gb|ACD01428.1| LIM and Rho-GAP domain containing protein [Neurospora crassa]
SMAC_04350	3		3	6	>ref|XP_965466.1| hypothetical protein NCU02693 [Neurospora crassa OR74A]
SMAC_04358	51	19	53	123	>ref|XP_965474.2| hypothetical protein NCU02701 [Neurospora crassa OR74A]
SMAC_04364	3		3	6	>ref|XP_965480.2| hypothetical protein NCU02707 [Neurospora crassa OR74A]
SMAC_04377	4		4	8	>ref|XP_960845.1| neutral trehalase [Neurospora crassa OR74A]
SMAC_04384	5		3	8	>ref|XP_961173.1| hypothetical protein NCU04213 [Neurospora crassa OR74A]
SMAC_04391			7	7	>emb|CAD36981.1| related to glucosidase II, alpha subunit [Neurospora crassa]
SMAC_04404	2			2	>sp|Q9HE88.1|SEC8_NEUCR RecName: Full=Probable exocyst complex component sec8
SMAC_04408	14	3	8	25	>ref|XP_961145.1| protein kinase gsk3 [Neurospora crassa OR74A]
SMAC_04416	73	44	51	168	>ref|XP_961133.2| actin [Neurospora crassa OR74A]
SMAC_04420		3		3	>ref|XP_960727.1| hypothetical protein NCU04169 [Neurospora crassa OR74A]
SMAC_04445	108	72	49	229	>ref|XP_001911127.1| hypothetical protein [Podospora anserina S mat+]
SMAC_04446	2		3	5	>ref|XP_961296.2| hypothetical protein NCU04140 [Neurospora crassa OR74A]
SMAC_04449	2			2	>ref|XP_961293.2| hypothetical protein NCU04137 [Neurospora crassa OR74A]
SMAC_04453	3		2	5	>ref|XP_961289.2| hypothetical protein NCU04133 [Neurospora crassa OR74A]
SMAC_04465		2		2	>emb|CAC28785.2| probable gamma-adaptin precursor [Neurospora crassa]
SMAC_04466			5	5	>ref|XP_382067.1| CALM_NEUCR Calmodulin (CaM) [Gibberella zeae PH-1]
SMAC_04470	2			2	>ref|XP_961272.1| hypothetical protein NCU04116 [Neurospora crassa OR74A]
SMAC_04471		2		2	>ref|XP_961271.1| hypothetical protein NCU04115 [Neurospora crassa OR74A]
SMAC_04481	2			2	>ref|XP_001911939.1| hypothetical protein [Podospora anserina S mat+]
SMAC_04482	13	9	7	29	>ref|XP_960866.1| hypothetical protein NCU04104 [Neurospora crassa OR74A]
SMAC_04485	12	3	15	30	>ref|XP_960862.1| vacuolar sorting protein 1 [Neurospora crassa OR74A]
SMAC_04506	8			8	>ref|XP_955998.2| nucleosome assembly protein [Neurospora crassa OR74A]
SMAC_04508	13	6	6	25	>emb|CAD70976.1| probable myosin MYO2 [Neurospora crassa]
SMAC_04510	2			2	>ref|XP_955963.1| hypothetical protein NCU01441 [Neurospora crassa OR74A]
SMAC_04535			3	3	>ref|XP_956089.1| hypothetical protein NCU08768 [Neurospora crassa OR74A]
SMAC_04568		2		2	>ref|XP_001912504.1| hypothetical protein [Podospora anserina S mat+]
SMAC_04573	5		7	12	>ref|XP_964223.1| cytochrome c peroxidase, mitochondrial precursor [Neurospora
SMAC_04577	15	3	8	26	>ref|XP_001220792.1| hypothetical protein CHGG_01571 [Chaetomium globosum CBS 148.51]
SMAC_04580	2			2	>ref|XP_964479.1| hypothetical protein NCU03302 [Neurospora crassa OR74A]
SMAC_04581			3	3	>ref|XP_964480.1| hypothetical protein NCU03303 [Neurospora crassa OR74A]
SMAC_04588	2			2	>ref|XP_964487.1| prohibitin-2 [Neurospora crassa OR74A]
SMAC_04596	2			2	>ref|XP_964496.1| hypothetical protein NCU03319 [Neurospora crassa OR74A]
SMAC_04606	4		2	6	>ref|XP_958320.2| glucose-6-phosphate 1-dehydrogenase [Neurospora crassa OR74A]
SMAC_04615	8		10	18	>ref|XP_958891.1| ATP synthase gamma chain, mitochondrial precursor [Neurospora
SMAC_04617	2			2	>ref|XP_958893.1| hypothetical protein NCU09121 [Neurospora crassa OR74A]
SMAC_04619	13	7	7	27	>ref|XP_958895.2| calcium/calmodulin-dependent protein kinase [Neurospora crassa
SMAC_04628	35	15	35	85	>ref|XP_958904.2| tubulin alpha chain [Neurospora crassa OR74A]
SMAC_04641			2	2	>ref|XP_963937.1| hypothetical protein NCU08390 [Neurospora crassa OR74A]
SMAC_04642	8			8	>ref|XP_963936.2| 60S ribosomal protein L20 [Neurospora crassa OR74A]
SMAC_04649	2			2	>ref|XP_963931.1| xylose reductase [Neurospora crassa OR74A]
SMAC_04650	2			2	>ref|XP_963932.1| protein phosphatases PP1 regulatory subunit sds22 [Neurospora
SMAC_04659		3		3	>ref|XP_961731.1| hypothetical protein NCU06534 [Neurospora crassa OR74A]
SMAC_04662	3		7	10	>ref|XP_962247.1| hypothetical protein NCU06540 [Neurospora crassa OR74A]
SMAC_04663			5	5	>ref|XP_962248.1| alpha-1,2 mannosyltransferase KTR1 [Neurospora crassa OR74A]
SMAC_04666	11	3	4	18	>ref|XP_962251.1| hypothetical protein NCU06544 [Neurospora crassa OR74A]
SMAC_04673	2			2	>gb|EFQ28328.1| hypothetical protein GLRG_03472 [Glomerella graminicola M1.001]
SMAC_04679			5	5	>ref|XP_962268.2| hypothetical protein NCU06561 [Neurospora crassa OR74A]
SMAC_04684	4		3	7	>ref|XP_962263.2| hypothetical protein NCU06556 [Neurospora crassa OR74A]
SMAC_04697	2		2	4	>ref|XP_961938.1| hypothetical protein NCU06578 [Neurospora crassa OR74A]
SMAC_04732			3	3	>ref|XP_962348.1| ubiquinol-cytochrome c reductase iron-sulfur subunit, mitochondrial
SMAC_04756	8	2	6	16	>ref|XP_961818.2| serine/threonine-protein phosphatase PP2A catalytic subunit [Neurospora
SMAC_04757	3			3	>sp|Q7S8B6.2|EXO84_NEUCR RecName: Full=Exocyst complex component EXO84
SMAC_04763	4		8	12	>ref|XP_964448.2| hypothetical protein NCU09746 [Neurospora crassa OR74A]
SMAC_04769			3	3	>ref|XP_964443.1| NADPH-cytochrome P450 reductase [Neurospora crassa OR74A]
SMAC_04785	4			4	>ref|XP_961985.1| hypothetical protein NCU07735 [Neurospora crassa OR74A]
SMAC_04798	27	7	6	40	>ref|XP_961971.2| 26S proteasome regulatory subunit rpn1 [Neurospora crassa OR74A]
SMAC_04810	6		3	9	>ref|XP_964453.2| UTP-glucose-1-phosphate uridylyltransferase [Neurospora crassa
SMAC_04815	1721	1911	2281	5913	>emb|CAE83713.1| putative signalling cascade component [Sordaria macrospora]
SMAC_04844	12			12	>emb|CAE00803.1| putative small G-protein [Sordaria macrospora]
SMAC_04850	3			3	>emb|CAE76318.1| related to glyoxal oxidase precursor [Neurospora crassa]
SMAC_04852	5	3	9	17	>emb|CAE76316.1| probable calcium-binding protein precursor cnx1 [Neurospora crassa]
SMAC_04881			2	2	>ref|XP_964674.1| proliferating cell nuclear antigen [Neurospora crassa OR74A]
SMAC_04901			2	2	>ref|XP_964815.1| hypothetical protein NCU08607 [Neurospora crassa OR74A]
SMAC_04917	4			4	>ref|XP_964828.1| 40S ribosomal protein S16 [Neurospora crassa OR74A]
SMAC_04927	13	4	4	21	>ref|XP_959838.1| pyruvate kinase [Neurospora crassa OR74A]
SMAC_04940	7		3	10	>ref|XP_964666.2| hypothetical protein NCU02044 [Neurospora crassa OR74A]
SMAC_04959	5			5	>ref|XP_964591.1| hypothetical protein NCU02064 [Neurospora crassa OR74A]
SMAC_04965	6	2	4	12	>ref|XP_964596.2| hypothetical protein NCU02069 [Neurospora crassa OR74A]
SMAC_04972	7	4	21	32	>ref|XP_001912463.1| hypothetical protein [Podospora anserina S mat+]
SMAC_05005	4			4	>ref|XP_964097.1| DNA-directed RNA polymerase II largest subunit [Neurospora crassa
SMAC_05008	2			2	>ref|XP_964105.1| myosin-5 [Neurospora crassa OR74A]
SMAC_05013			2	2	>ref|XP_964107.1| ubiquitin-conjugating enzyme E2 13 [Neurospora crassa OR74A]
SMAC_05032	9		5	14	>ref|XP_964294.1| transaldolase [Neurospora crassa OR74A]
SMAC_05058	5		4	9	>ref|XP_960620.2| AP-1 complex subunit mu [Neurospora crassa OR74A]
SMAC_05060	2			2	>ref|XP_960636.2| hypothetical protein NCU09689 [Neurospora crassa OR74A]
SMAC_05066	2	2	5	9	>ref|XP_960640.1| hypothetical protein NCU09693 [Neurospora crassa OR74A]
SMAC_05099	10	6	13	29	>ref|XP_958689.1| ATP-binding cassette sub-family F member 2 [Neurospora crassa
SMAC_05130	4			4	>ref|XP_958832.1| glutamyl-tRNA synthetase [Neurospora crassa OR74A]
SMAC_05132			2	2	>ref|XP_958824.1| hypothetical protein NCU08886 [Neurospora crassa OR74A]
SMAC_05148			2	2	>ref|XP_958550.1| hypothetical protein NCU07757 [Neurospora crassa OR74A]
SMAC_05150	3		3	6	>ref|XP_958548.2| tyrosyl-tRNA synthetase [Neurospora crassa OR74A]
SMAC_05176	7	7	11	25	>ref|XP_963919.1| hypothetical protein NCU07468 [Neurospora crassa OR74A]
SMAC_05178	4			4	>ref|XP_963917.1| hypothetical protein NCU07466 [Neurospora crassa OR74A]
SMAC_05186	49	14	11	74	>ref|XP_963910.1| protein arginine N-methyltransferase 1 [Neurospora crassa OR74A]
SMAC_05188	5		2	7	>ref|XP_963909.2| hypothetical protein NCU07458 [Neurospora crassa OR74A]
SMAC_05195	6	2	8	16	>ref|XP_964638.1| hypothetical protein NCU07451 [Neurospora crassa OR74A]
SMAC_05223	3		2	5	>ref|XP_959453.1| malate synthase [Neurospora crassa OR74A]
SMAC_05224		2		2	>ref|XP_959454.1| fumarate hydratase, mitochondrial precursor [Neurospora crassa
SMAC_05233	13	3	13	29	>ref|XP_964893.2| ATP-dependent RNA helicase [Neurospora crassa OR74A]
SMAC_05243	3	4	6	13	>ref|XP_964907.1| hypothetical protein NCU09090 [Neurospora crassa OR74A]
SMAC_05258	4			4	>ref|XP_964920.1| hypothetical protein NCU09103 [Neurospora crassa OR74A]
SMAC_05267	18		8	26	>ref|XP_964251.2| 40S ribosomal protein S4 [Neurospora crassa OR74A]
SMAC_05288	16	2	5	23	>ref|XP_391281.1| hypothetical protein FG11105.1 [Gibberella zeae PH-1]
SMAC_05289	6		5	11	>ref|XP_391280.1| hypothetical protein FG11104.1 [Gibberella zeae PH-1]
SMAC_05314	4			4	>ref|XP_962936.1| hypothetical protein NCU07815 [Neurospora crassa OR74A]
SMAC_05316	2			2	>ref|XP_957122.1| pyruvate dehydrogenase E1 component alpha subunit, mitochondrial
SMAC_05319	2		6	8	>ref|XP_957124.1| hypothetical protein NCU06484 [Neurospora crassa OR74A]
SMAC_05345	15	3	8	26	>ref|XP_957152.1| 5-methyltetrahydropteroyltriglutamate-homocysteine methyltransferase
SMAC_05372	2	4	7	13	>ref|XP_962916.2| hypothetical protein NCU06200 [Neurospora crassa OR74A]
SMAC_05377			4	4	>ref|XP_964111.2| hypothetical protein NCU01927 [Neurospora crassa OR74A]
SMAC_05388	18	7	9	34	>ref|XP_964123.1| hypothetical protein NCU01939 [Neurospora crassa OR74A]
SMAC_05391	3	5	3	11	>ref|XP_001728553.1| IMP-specific 5'-nucleotidase 1 [Neurospora crassa OR74A]
SMAC_05393	4			4	>ref|XP_964232.1| hypothetical protein NCU01948 [Neurospora crassa OR74A]
SMAC_05394	4			4	>ref|XP_964233.1| 40S ribosomal protein S9 [Neurospora crassa OR74A]
SMAC_05399	10	2	10	22	>ref|XP_964239.1| hypothetical protein NCU01955 [Neurospora crassa OR74A]
SMAC_05406			4	4	>ref|XP_964326.1| hypothetical protein NCU01962 [Neurospora crassa OR74A]
SMAC_05425	4	2		6	>ref|XP_964345.2| protein translation factor sui1 [Neurospora crassa OR74A]
SMAC_05435	26	8	16	50	>ref|XP_964857.1| hypothetical protein NCU01992 [Neurospora crassa OR74A]
SMAC_05446	214	137	135	486	>sp|Q09069.1|EF1A_SORMA RecName: Full=Elongation factor 1-alpha; Short=EF-1-alpha
SMAC_05453	5	3	5	13	>ref|XP_964875.1| 2-isopropylmalate synthase [Neurospora crassa OR74A]
SMAC_05454	16	18	11	45	>ref|XP_964876.1| hypothetical protein NCU02011 [Neurospora crassa OR74A]
SMAC_05460	2			2	>ref|XP_964881.1| hypothetical protein NCU02016 [Neurospora crassa OR74A]
SMAC_05471			2	2	>ref|XP_964649.1| hypothetical protein NCU02027 [Neurospora crassa OR74A]
SMAC_05504	11	4	6	21	>ref|XP_958040.1| mitogen-activated protein kinase MKC1 [Neurospora crassa OR74A]
SMAC_05514	4		4	8	>ref|XP_960786.1| 60S ribosomal protein L10 [Neurospora crassa OR74A]
SMAC_05515	12			12	>ref|XP_960785.1| 60S ribosomal protein L30 [Neurospora crassa OR74A]
SMAC_05523	3		3	6	>ref|XP_960680.1| hypothetical protein NCU08956 [Neurospora crassa OR74A]
SMAC_05527	3			3	>ref|XP_960676.1| hypothetical protein NCU08952 [Neurospora crassa OR74A]
SMAC_05529	2			2	>ref|XP_960673.2| hypothetical protein NCU08949 [Neurospora crassa OR74A]
SMAC_05531	6			6	>ref|XP_960814.1| ubiquinol-cytochrome-C oxidoreductase complex III subunit VIII,
SMAC_05532	3			3	>emb|CAD71006.1| probable prohibitin PHB1 [Neurospora crassa]
SMAC_05534			4	4	>ref|XP_960811.1| hypothetical protein NCU08944 [Neurospora crassa OR74A]
SMAC_05539	4			4	>ref|XP_960807.1| ubiquinol-cytochrome c reductase complex 14 kDa protein [Neurospora
SMAC_05550	2			2	>ref|XP_960609.1| dihydroceramide delta(4)-desaturase [Neurospora crassa OR74A]
SMAC_05553	12	8	3	23	>emb|CAD70984.1| related to ACYL-COA DEHYDROGENASE, LONG-CHAIN SPECIFIC PRECURSOR
SMAC_05557	20	4	7	31	>ref|XP_960578.1| 60S ribosomal protein L5 [Neurospora crassa OR74A]
SMAC_05562	2			2	>ref|XP_960973.1| DNA replication licensing factor mcm2 [Neurospora crassa OR74A]
SMAC_05571			3	3	>emb|CAD71044.1| related to KEX1 protein precursor [Neurospora crassa]
SMAC_05582	13		10	23	>ref|XP_960950.1| outer mitochondrial membrane protein porin [Neurospora crassa
SMAC_05593	2			2	>ref|XP_961083.1| hypothetical protein NCU04293 [Neurospora crassa OR74A]
SMAC_05597	5			5	>ref|XP_961079.1| hypothetical protein NCU04289 [Neurospora crassa OR74A]
SMAC_05650	4		3	7	>emb|CAM35474.1| putative trihydroxynaphthalene reductase [Sordaria macrospora]
SMAC_05656	5		17	22	>ref|XP_958746.1| hypothetical protein NCU09403 [Neurospora crassa OR74A]
SMAC_05687	4			4	>ref|XP_957989.1| hypothetical protein NCU09429 [Neurospora crassa OR74A]
SMAC_05696	6	9	23	38	>ref|XP_957939.1| hypothetical protein NCU10051 [Neurospora crassa OR74A]
SMAC_05699	12	7	6	25	>ref|XP_959484.2| hypothetical protein NCU09559 [Neurospora crassa OR74A]
SMAC_05724	3			3	>ref|XP_963976.1| argininosuccinate synthase [Neurospora crassa OR74A]
SMAC_05737	6		2	8	>ref|XP_964049.2| cytochrome P450 51 [Neurospora crassa OR74A]
SMAC_05764	4			4	>ref|XP_965002.1| hypothetical protein NCU02599 [Neurospora crassa OR74A]
SMAC_05789		2		2	>ref|XP_965702.2| acetyl-CoA acetyltransferase [Neurospora crassa OR74A]
SMAC_05794	3			3	>ref|XP_965697.2| alanyl-tRNA synthetase [Neurospora crassa OR74A]
SMAC_05811	2			2	>ref|XP_965680.1| mitochondrial processing peptidase beta subunit [Neurospora crassa
SMAC_05819	8	4	14	26	>ref|XP_965672.1| hypothetical protein NCU02541 [Neurospora crassa OR74A]
SMAC_05824	5	2		7	>ref|XP_965665.2| NADH:ubiquinone oxidoreductase 49kD subunit [Neurospora crassa
SMAC_05829	3			3	>ref|XP_965669.1| hypothetical protein NCU02538 [Neurospora crassa OR74A]
SMAC_05830			3	3	>ref|XP_965670.1| cell division control protein 54 [Neurospora crassa OR74A]
SMAC_05844	2	2	4	8	>ref|XP_958987.1| hypothetical protein NCU09040 [Neurospora crassa OR74A]
SMAC_05880	29	7	34	70	>emb|CAM35472.1| putative tetrahydroxynaphthalene reductase [Sordaria macrospora]
SMAC_05897	5			5	>ref|XP_959239.1| 40S ribosomal protein S20 [Neurospora crassa OR74A]
SMAC_05913	5		5	10	>ref|XP_959224.2| hypothetical protein NCU06877 [Neurospora crassa OR74A]
SMAC_05916	16	6	9	31	>ref|XP_959222.1| hypothetical protein NCU06875 [Neurospora crassa OR74A]
SMAC_05918	12	6	4	22	>ref|XP_957980.1| 1,3-beta-glucan synthase component GLS1 [Neurospora crassa OR74A]
SMAC_05926	2			2	>ref|XP_958029.1| histone H1 [Neurospora crassa OR74A]
SMAC_05955		3	3	6	>ref|XP_001728419.1| prenylated Rab acceptor 1 [Neurospora crassa OR74A]
SMAC_05959	66	20	27	113	>ref|XP_965645.1| ATP synthase alpha chain, mitochondrial precursor [Neurospora
SMAC_05963	38	26	22	86	>ref|XP_965641.1| clathrin heavy chain [Neurospora crassa OR74A]
SMAC_05967	15	5	29	49	>ref|XP_965636.1| pyruvate carboxylase [Neurospora crassa OR74A]
SMAC_05986	6	2	5	13	>ref|XP_965072.1| hypothetical protein NCU02478 [Neurospora crassa OR74A]
SMAC_06020	6		7	13	>ref|XP_958066.1| hypothetical protein NCU10018 [Neurospora crassa OR74A]
SMAC_06024	3			3	>ref|XP_958069.2| hypothetical protein NCU10021 [Neurospora crassa OR74A]
SMAC_06034			4	4	>ref|XP_958960.1| hypothetical protein NCU09721 [Neurospora crassa OR74A]
SMAC_06043	12	4	16	32	>ref|XP_958954.1| alpha,alpha-trehalose-phosphate synthase [Neurospora crassa OR74A]
SMAC_06049	2			2	>ref|XP_958950.1| hypothetical protein NCU09711 [Neurospora crassa OR74A]
SMAC_06051	3			3	>ref|XP_958948.1| T-complex protein 1 subunit zeta [Neurospora crassa OR74A]
SMAC_06061	4		11	15	>ref|XP_958939.1| T-complex protein 1 subunit eta [Neurospora crassa OR74A]
SMAC_06066			3	3	>ref|XP_001727992.1| mitochondrial ribosomal protein subunit S4 [Neurospora crassa
SMAC_06073	11			11	>ref|XP_955944.2| hypothetical protein NCU04553 [Neurospora crassa OR74A]
SMAC_06085	4			4	>ref|XP_955984.1| hypothetical protein NCU04544 [Neurospora crassa OR74A]
SMAC_06117	9		9	18	>pir||T49744 probable ubiquitin-protein ligase [imported] - Neurospora crassa
SMAC_06136	2		4	6	>gb|AAK08514.1|AF338412_1 vivid PAS protein VVD [Neurospora crassa]
SMAC_06143	11	10	7	28	>ref|XP_957611.1| hypothetical protein NCU03972 [Neurospora crassa OR74A]
SMAC_06144	4	2		6	>ref|XP_957612.1| hypothetical protein NCU03973 [Neurospora crassa OR74A]
SMAC_06155	4			4	>ref|XP_956565.2| T-complex protein 1 subunit epsilon [Neurospora crassa OR74A]
SMAC_06157	21	9	28	58	>ref|XP_956567.1| 78 kDa glucose-regulated protein precursor [Neurospora crassa
SMAC_06165	8			8	>ref|XP_956573.1| 60S ribosomal protein L18 [Neurospora crassa OR74A]
SMAC_06170	3			3	>ref|XP_956577.2| fimbrin [Neurospora crassa OR74A]
SMAC_06177	2	3		5	>ref|XP_957616.1| hypothetical protein NCU04001 [Neurospora crassa OR74A]
SMAC_06181	2		2	4	>emb|CAD79681.1| conserved hypothetical protein [Neurospora crassa]
SMAC_06203	163	76	126	365	>sp|Q8WZN0.2|G3P_SORMA RecName: Full=Glyceraldehyde-3-phosphate dehydrogenase; Short=GAPDH
SMAC_06213	2			2	>ref|XP_956964.1| DNA-directed RNA polymerase II 33 kDa polypeptide [Neurospora
SMAC_06235	2			2	>ref|XP_955922.1| hypothetical protein NCU01489 [Neurospora crassa OR74A]
SMAC_06237			2	2	>ref|XP_956763.1| hypothetical protein NCU01486 [Neurospora crassa OR74A]
SMAC_06239	17	5	9	31	>ref|XP_956761.2| GTP-binding protein RHO-1 protein [Neurospora crassa OR74A]
SMAC_06242	14	3	15	32	>ref|XP_963165.1| vacuolar ATP synthase subunit B [Neurospora crassa OR74A]
SMAC_06256			3	3	>ref|XP_963436.1| hypothetical protein NCU08507 [Neurospora crassa OR74A]
SMAC_06257	3			3	>ref|XP_963436.1| hypothetical protein NCU08507 [Neurospora crassa OR74A]
SMAC_06262	6			6	>ref|XP_963431.1| 40S ribosomal protein S6 [Neurospora crassa OR74A]
SMAC_06263	18	5	4	27	>emb|CAB92704.2| related to TOM1 protein [Neurospora crassa]
SMAC_06264	4			4	>ref|XP_001228090.1| conserved hypothetical protein [Chaetomium globosum CBS 148.51]
SMAC_06265	2		2	4	>ref|XP_963428.2| hypothetical protein NCU08499 [Neurospora crassa OR74A]
SMAC_06278	3			3	>ref|XP_955863.1| 40 kDa peptidyl-prolyl cis-trans isomerase [Neurospora crassa
SMAC_06282	9	2	7	18	>ref|XP_955850.1| hypothetical protein NCU03857 [Neurospora crassa OR74A]
SMAC_06299	5		6	11	>ref|XP_956549.1| eukaryotic translation initiation factor 3 subunit 2 [Neurospora
SMAC_06301	7		4	11	>ref|XP_960102.1| hypothetical protein NCU05842 [Neurospora crassa OR74A]
SMAC_06315	4	2	3	9	>ref|XP_957527.1| hypothetical protein NCU03888 [Neurospora crassa OR74A]
SMAC_06322	27	6	11	44	>ref|XP_957536.1| hypothetical protein NCU03897 [Neurospora crassa OR74A]
SMAC_06340		3	3	6	>ref|XP_957561.1| hydroxymethylglutaryl-CoA synthase [Neurospora crassa OR74A]
SMAC_06365	3			3	>ref|XP_960011.2| hypothetical protein NCU06149 [Neurospora crassa OR74A]
SMAC_06396	88	39	43	170	>ref|XP_959985.1| hypothetical protein NCU06123 [Neurospora crassa OR74A]
SMAC_06397			2	2	>ref|XP_959984.2| hypothetical protein NCU06122 [Neurospora crassa OR74A]
SMAC_06411	3			3	>ref|XP_959970.2| hypothetical protein NCU06108 [Neurospora crassa OR74A]
SMAC_06414			6	6	>ref|XP_959967.1| hypothetical protein NCU11302 [Neurospora crassa OR74A]
SMAC_06416	67	21	23	111	>ref|XP_959965.1| hypothetical protein NCU11301 [Neurospora crassa OR74A]
SMAC_06423	6	3	5	14	>ref|XP_959553.1| vacuolar protein sorting-associated protein 74 [Neurospora crassa
SMAC_06428	2			2	>ref|XP_959548.1| hypothetical protein NCU06086 [Neurospora crassa OR74A]
SMAC_06445	7	8	9	24	>ref|XP_001728508.1| hypothetical protein NCU11181 [Neurospora crassa OR74A]
SMAC_06448	4			4	>ref|XP_957265.1| hypothetical protein NCU00379 [Neurospora crassa OR74A]
SMAC_06469	5	3	3	11	>ref|XP_957823.1| hypothetical protein NCU00352 [Neurospora crassa OR74A]
SMAC_06501	3			3	>gb|EFX00346.1| peroxisomal carrier [Grosmannia clavigera kw1407]
SMAC_06516	15		5	20	>ref|XP_958843.1| hypothetical protein NCU04600 [Neurospora crassa OR74A]
SMAC_06525	2		2	4	>ref|XP_958854.1| hypothetical protein NCU04611 [Neurospora crassa OR74A]
SMAC_06526	10		7	17	>ref|XP_958855.1| hypothetical protein NCU04612 [Neurospora crassa OR74A]
SMAC_06534	4			4	>emb|CAD70904.1| conserved hypothetical protein [Neurospora crassa]
SMAC_06539	2			2	>emb|CAR63507.1| E1-like activating enzyme [Sordaria macrospora]
SMAC_06549	7		4	11	>ref|XP_960908.1| 60S ribosomal protein L22 [Neurospora crassa OR74A]
SMAC_06550	2			2	>emb|CAD70888.1| conserved hypothetical protein [Neurospora crassa]
SMAC_06557			4	4	>ref|XP_960697.1| S-(hydroxymethyl)glutathione dehydrogenase [Neurospora crassa
SMAC_06573	5		4	9	>ref|XP_960692.1| hypothetical protein NCU01424 [Neurospora crassa OR74A]
SMAC_06580	2		2	4	>emb|CAD70878.1| related to acetyl coenzyme A synthetase [Neurospora crassa]
SMAC_06590	3		2	5	>ref|XP_958756.1| hypothetical protein NCU09537 [Neurospora crassa OR74A]
SMAC_06601	4		7	11	>ref|XP_960660.1| hypothetical protein NCU06732 [Neurospora crassa OR74A]
SMAC_06605	2			2	>ref|XP_960657.2| hypothetical protein NCU06729 [Neurospora crassa OR74A]
SMAC_06609	9	3		12	>ref|XP_960904.2| glutamine synthetase [Neurospora crassa OR74A]
SMAC_06616	6			6	>ref|XP_960897.1| hypothetical protein NCU06717 [Neurospora crassa OR74A]
SMAC_06633	5	3	3	11	>ref|XP_961017.1| protein yop-1 [Neurospora crassa OR74A]
SMAC_06635	2		2	4	>ref|XP_961015.1| hypothetical protein NCU06700 [Neurospora crassa OR74A]
SMAC_06640	9		9	18	>ref|XP_961010.1| cytochrome c oxidase polypeptide VI, mitochondrial precursor
SMAC_06646	19	2	10	31	>ref|XP_961002.1| glycogen synthase [Neurospora crassa OR74A]
SMAC_06655	5			5	>ref|XP_957714.2| hypothetical protein NCU00243 [Neurospora crassa OR74A]
SMAC_06672	17	4	6	27	>ref|XP_957729.1| 40S ribosomal protein S7 [Neurospora crassa OR74A]
SMAC_06675	6			6	>ref|XP_957732.1| CTP synthase [Neurospora crassa OR74A]
SMAC_06677			5	5	>ref|XP_957734.1| hypothetical protein NCU00263 [Neurospora crassa OR74A]
SMAC_06686	7	2		9	No hits found
SMAC_06692	2			2	No hits found
SMAC_06705	15	4	3	22	>ref|XP_957765.1| 60S ribosomal protein L10a [Neurospora crassa OR74A]
SMAC_06726	2			2	>ref|XP_963507.1| hypothetical protein NCU06735 [Neurospora crassa OR74A]
SMAC_06728	6	2	8	16	>ref|XP_963510.1| hypothetical protein NCU06738 [Neurospora crassa OR74A]
SMAC_06730	6	3		9	>ref|XP_963512.1| hypothetical protein NCU06740 [Neurospora crassa OR74A]
SMAC_06733	4			4	>ref|XP_963515.2| 40S ribosomal protein S10 [Neurospora crassa OR74A]
SMAC_06751	2	2	2	6	>ref|XP_963532.2| hypothetical protein NCU06760 [Neurospora crassa OR74A]
SMAC_06752	3			3	>ref|XP_963533.1| sphingosine-1-phosphate lyase [Neurospora crassa OR74A]
SMAC_06753	2			2	>ref|XP_963534.1| hypothetical protein NCU06762 [Neurospora crassa OR74A]
SMAC_06774	19	2	10	31	>ref|XP_963624.2| hypothetical protein NCU06783 [Neurospora crassa OR74A]
SMAC_06775	23	5	25	53	>sp|O93988.1|ACL1_SORMK RecName: Full=ATP-citrate synthase subunit 1; AltName: Full=ATP-citrate
SMAC_06911	3			3	>ref|XP_957407.1| 40S ribosomal protein S24 [Neurospora crassa OR74A]
SMAC_06922	8	2	4	14	>ref|XP_957398.1| ADP-ribosylation factor 6 [Neurospora crassa OR74A]
SMAC_06923			2	2	>ref|XP_957396.1| hypothetical protein NCU07171 [Neurospora crassa OR74A]
SMAC_06937	21	4	9	34	>ref|XP_957378.1| hypothetical protein NCU07153 [Neurospora crassa OR74A]
SMAC_06945	4	2		6	>ref|XP_958123.2| hypothetical protein NCU05928 [Neurospora crassa OR74A]
SMAC_06963	4	4	4	12	>ref|XP_958781.1| hypothetical protein NCU05937 [Neurospora crassa OR74A]
SMAC_07009	3			3	>ref|XP_001228538.1| hypothetical protein CHGG_10611 [Chaetomium globosum CBS 148.51]
SMAC_07013	12		6	18	>emb|CAD70981.1| probable serine-tRNA ligase, cytosolic [Neurospora crassa]
SMAC_07014			2	2	>ref|XP_955966.1| hypothetical protein NCU01444 [Neurospora crassa OR74A]
SMAC_07016	9	4		13	>ref|XP_955968.1| uracil phosphoribosyltransferase [Neurospora crassa OR74A]
SMAC_07018			3	3	>ref|XP_955971.1| hypothetical protein NCU01449 [Neurospora crassa OR74A]
SMAC_07020	9		2	11	>ref|XP_955974.2| 40S ribosomal protein S1 [Neurospora crassa OR74A]
SMAC_07040	6	2		8	>ref|XP_956747.1| vacuolar protein 8 [Neurospora crassa OR74A]
SMAC_07050	3			3	>ref|XP_956756.1| hypothetical protein NCU01479 [Neurospora crassa OR74A]
SMAC_07073	7		4	11	>ref|XP_963098.1| hypothetical protein NCU06247 [Neurospora crassa OR74A]
SMAC_07079	14	2	9	25	>ref|XP_963093.2| hypothetical protein NCU06242 [Neurospora crassa OR74A]
SMAC_07082	5	5	2	12	>sp|Q6TWC4.1|LEU3_SORMA RecName: Full=3-isopropylmalate dehydrogenase; Short=3-IPM-DH;
SMAC_07091	4			4	>ref|XP_963077.1| 60S ribosomal protein L25 [Neurospora crassa OR74A]
SMAC_07106	3			3	>ref|XP_962927.1| malate dehydrogenase, mitochondrial precursor [Neurospora crassa
SMAC_07107	7			7	>ref|XP_962926.1| hypothetical protein NCU06210 [Neurospora crassa OR74A]
SMAC_07111	4			4	>ref|XP_962921.1| hypothetical protein NCU06205 [Neurospora crassa OR74A]
SMAC_07117	3			3	>ref|XP_957659.1| NADH-quinone oxidoreductase chain F 1 [Neurospora crassa OR74A]
SMAC_07127	3			3	>ref|XP_957649.1| hypothetical protein NCU04034 [Neurospora crassa OR74A]
SMAC_07144	2			2	>ref|XP_961848.1| bifunctional P-450:NADPH-P450 reductase [Neurospora crassa OR74A]
SMAC_07160	3		2	5	>emb|CAF06096.1| probable replication licensing factor [Neurospora crassa]
SMAC_07169	2			2	>ref|XP_961892.2| hypothetical protein NCU05232 [Neurospora crassa OR74A]
SMAC_07176	2		2	4	>ref|XP_961885.1| hypothetical protein NCU05225 [Neurospora crassa OR74A]
SMAC_07196	4		4	8	>ref|XP_962203.2| hypothetical protein NCU05204 [Neurospora crassa OR74A]
SMAC_07214			2	2	>ref|XP_956369.1| hypothetical protein NCU03480 [Neurospora crassa OR74A]
SMAC_07220	3		2	5	>gb|AAF08294.1|AF195874_1 heterokaryon incompatibility protein HET-C [Neurospora crassa]
SMAC_07234	10		3	13	>ref|XP_955837.2| hypothetical protein NCU03500 [Neurospora crassa OR74A]
SMAC_07250	4			4	No hits found
SMAC_07268	12	5	12	29	>ref|XP_958712.1| 3-ketoacyl-CoA thiolase [Neurospora crassa OR74A]
SMAC_07281	5		4	9	>ref|XP_958724.1| hypothetical protein NCU09658 [Neurospora crassa OR74A]
SMAC_07310	2			2	>ref|XP_962852.1| hypothetical protein NCU07618 [Neurospora crassa OR74A]
SMAC_07332	23	6	27	56	>ref|XP_957492.1| hypothetical protein NCU04415 [Neurospora crassa OR74A]
SMAC_07333	12		4	16	>ref|XP_957491.2| hypothetical protein NCU04414 [Neurospora crassa OR74A]
SMAC_07337	4	5	9	18	>ref|XP_957487.1| hypothetical protein NCU04410 [Neurospora crassa OR74A]
SMAC_07343	10	2	7	19	>ref|XP_957481.1| coatomer beta subunit [Neurospora crassa OR74A]
SMAC_07347			4	4	>ref|XP_957478.1| hypothetical protein NCU04401 [Neurospora crassa OR74A]
SMAC_07365	2		8	10	>ref|XP_961840.1| hypothetical protein NCU07019 [Neurospora crassa OR74A]
SMAC_07366	3			3	>ref|XP_001906705.1| hypothetical protein [Podospora anserina S mat+]
SMAC_07382			7	7	>ref|XP_962643.1| hypothetical protein NCU07003 [Neurospora crassa OR74A]
SMAC_07393	2		2	4	>ref|XP_959418.1| hypothetical protein NCU06017 [Neurospora crassa OR74A]
SMAC_07413			3	3	>ref|XP_959817.1| squalene synthetase [Neurospora crassa OR74A]
SMAC_07419	22		6	28	>ref|XP_959810.1| 40S ribosomal protein S2 [Neurospora crassa OR74A]
SMAC_07451	2			2	>ref|XP_959272.1| glycylpeptide N-tetradecanoyltransferase [Neurospora crassa OR74A]
SMAC_07470	3		5	8	>ref|XP_958048.1| vacuolar protein sorting-associated protein VPS4 [Neurospora
SMAC_07474			3	3	>ref|XP_958051.1| hypothetical protein NCU06945 [Neurospora crassa OR74A]
SMAC_07478	3			3	>ref|XP_958218.2| hypothetical protein NCU06948 [Neurospora crassa OR74A]
SMAC_07504	3			3	>ref|XP_959457.1| hypothetical protein NCU05899 [Neurospora crassa OR74A]
SMAC_07507	3		3	6	>ref|XP_959460.1| hypothetical protein NCU05902 [Neurospora crassa OR74A]
SMAC_07518	2		4	6	>ref|XP_959179.1| cysteine desulfurase, mitochondrial precursor [Neurospora crassa
SMAC_07533	16	6	9	31	>ref|XP_961573.1| vacuolar ATP synthase catalytic subunit A [Neurospora crassa
SMAC_07544	2			2	>ref|XP_961563.1| hypothetical protein NCU01197 [Neurospora crassa OR74A]
SMAC_07557	6			6	>emb|CAD21398.1| probable GTP-binding protein [Neurospora crassa]
SMAC_07559		3	5	8	>ref|XP_961547.1| hypothetical protein NCU01181 [Neurospora crassa OR74A]
SMAC_07561	2		3	5	>ref|XP_961545.1| hypothetical protein NCU01179 [Neurospora crassa OR74A]
SMAC_07567	7		6	13	>ref|XP_956068.1| hypothetical protein NCU05079 [Neurospora crassa OR74A]
SMAC_07575	8			8	>ref|XP_956058.1| hypothetical protein NCU05069 [Neurospora crassa OR74A]
SMAC_07606	18	6	24	48	>ref|XP_956349.1| hypothetical protein NCU05041 [Neurospora crassa OR74A]
SMAC_07622	2			2	>ref|XP_960091.1| hypothetical protein NCU05831 [Neurospora crassa OR74A]
SMAC_07639	4			4	>ref|XP_960070.1| hypothetical protein NCU05810 [Neurospora crassa OR74A]
SMAC_07644	22	6	8	36	>ref|XP_960063.1| hypothetical protein NCU05803 [Neurospora crassa OR74A]
SMAC_07680			2	2	>ref|XP_955933.1| hypothetical protein NCU05006 [Neurospora crassa OR74A]
SMAC_07681	5			5	>ref|XP_955936.1| NADH:ubiquinone oxidoreductase 21.3c kD subunit [Neurospora crassa
SMAC_07747			3	3	>ref|XP_960273.1| hypothetical protein NCU07112 [Neurospora crassa OR74A]
SMAC_07771	3		2	5	>gb|AAD49743.1| ribonucleotide reductase large subunit [Neurospora crassa]
SMAC_07792	2			2	>emb|CAD21051.1| hypothetical protein [Neurospora crassa]
SMAC_07794	2			2	>ref|XP_956119.2| hypothetical protein NCU03556 [Neurospora crassa OR74A]
SMAC_07797	4	4	4	12	>ref|XP_956122.2| hypothetical protein NCU03559 [Neurospora crassa OR74A]
SMAC_07803	5			5	>ref|XP_956128.1| hypothetical protein NCU03565 [Neurospora crassa OR74A]
SMAC_07805	3			3	>emb|CAD70303.1| related to SWI/SNF complex 60 KDa subunit [Neurospora crassa]
SMAC_07812	983	280	200	1463	>gb|EFW20718.1| isoleucyl-tRNA synthetase [Coccidioides posadasii str. Silveira]
SMAC_07817	41	9	12	62	>emb|CAC18309.2| related to SIS2 protein (cycle-specific gene control) [Neurospora
SMAC_07823	4		2	6	>ref|XP_961235.1| hypothetical protein NCU04244 [Neurospora crassa OR74A]
SMAC_07824	2		3	5	>ref|XP_961236.1| mitochondrial precursor protein import receptor tom70 [Neurospora
SMAC_07827	4			4	>ref|XP_961238.1| actin-2 [Neurospora crassa OR74A]
SMAC_07828	9	11	2	22	>ref|XP_961242.1| chitin synthase 2 [Neurospora crassa OR74A]
SMAC_07829	8		4	12	>ref|XP_961243.2| hypothetical protein NCU04252 [Neurospora crassa OR74A]
SMAC_07837	4		4	8	>ref|XP_961255.1| hypothetical protein NCU04264 [Neurospora crassa OR74A]
SMAC_07840			2	2	>ref|XP_961259.1| hypothetical protein NCU04268 [Neurospora crassa OR74A]
SMAC_07848	2		2	4	>ref|XP_961069.2| hypothetical protein NCU04279 [Neurospora crassa OR74A]
SMAC_07853	11	3	6	20	>ref|XP_958521.1| hypothetical protein NCU09526 [Neurospora crassa OR74A]
SMAC_07925		3	50	53	>ref|XP_958803.1| polyubiquitin [Neurospora crassa OR74A]
SMAC_07928	17	12	9	38	>ref|XP_958811.1| mannose-1-phosphate guanyltransferase [Neurospora crassa OR74A]
SMAC_07971			2	2	>ref|XP_960667.2| hypothetical protein NCU08874 [Neurospora crassa OR74A]
SMAC_07972	21	11	12	44	>ref|XP_960668.2| hypothetical protein NCU08875 [Neurospora crassa OR74A]
SMAC_08015			4	4	>ref|XP_959289.2| hypothetical protein NCU08199 [Neurospora crassa OR74A]
SMAC_08016	13	3	10	26	>ref|XP_958362.1| hypothetical protein NCU07514 [Neurospora crassa OR74A]
SMAC_08028	4			4	>pir||T49760 probable cytosolic arginine-tRNA ligase [imported] - Neurospora
SMAC_08038	5	2	3	10	>ref|XP_963873.1| hypothetical protein NCU08114 [Neurospora crassa OR74A]
SMAC_08053	5	4	2	11	>ref|XP_965050.1| hypothetical protein NCU07503 [Neurospora crassa OR74A]
SMAC_08084	7	5	7	19	>ref|XP_957240.2| hypothetical protein NCU00116 [Neurospora crassa OR74A]
SMAC_08089	2			2	>ref|XP_957236.1| hypothetical protein NCU00112 [Neurospora crassa OR74A]
SMAC_08097	16	4	11	31	>ref|XP_001229857.1| heat shock protein HSP98 [Chaetomium globosum CBS 148.51]
SMAC_08100			2	2	>ref|XP_957225.1| hypothetical protein NCU00101 [Neurospora crassa OR74A]
SMAC_08103	2		2	4	>ref|XP_957219.1| hypothetical protein NCU00095 [Neurospora crassa OR74A]
SMAC_08139	4	3	5	12	>ref|XP_963281.1| tryptophan synthase [Neurospora crassa OR74A]
SMAC_08144			4	4	>ref|XP_001728111.1| hypothetical protein NCU11068 [Neurospora crassa OR74A]
SMAC_08161	64	22	79	165	>sp|Q92335.2|TBA_SORMK RecName: Full=Tubulin alpha chain
SMAC_08166	20	4	15	39	>ref|XP_963218.1| hypothetical protein NCU09463 [Neurospora crassa OR74A]
SMAC_08173	2			2	>ref|XP_963204.1| hypothetical protein NCU09480 [Neurospora crassa OR74A]
SMAC_08176	19	17	31	67	>ref|XP_963201.1| ADP,ATP carrier protein [Neurospora crassa OR74A]
SMAC_08177	2			2	>ref|XP_963231.1| 40S ribosomal protein S25 [Neurospora crassa OR74A]
SMAC_08178	8			8	>ref|XP_963230.2| 40s ribosomal protein s5 [Neurospora crassa OR74A]
SMAC_08182	6	4		10	>ref|XP_963226.1| hypothetical protein NCU09471 [Neurospora crassa OR74A]
SMAC_08183			2	2	>ref|XP_963225.1| hypothetical protein NCU09470 [Neurospora crassa OR74A]
SMAC_08196			2	2	>ref|XP_963158.1| hypothetical protein NCU09492 [Neurospora crassa OR74A]
SMAC_08204			2	2	>ref|XP_960977.1| hypothetical protein NCU08847 [Neurospora crassa OR74A]
SMAC_08213	3			3	>ref|XP_958393.1| fructose-bisphosphate aldolase [Neurospora crassa OR74A]
SMAC_08248	16	6	16	38	>ref|XP_956305.2| hypothetical protein NCU03370 [Neurospora crassa OR74A]
SMAC_08261	5	6	3	14	>ref|XP_956834.1| vesicular-fusion protein SEC18 [Neurospora crassa OR74A]
SMAC_08263	6		3	9	>ref|XP_956835.2| hypothetical protein NCU03388 [Neurospora crassa OR74A]
SMAC_08275	6		4	10	>ref|XP_956840.1| 40S ribosomal protein S0 [Neurospora crassa OR74A]
SMAC_08290			3	3	>ref|XP_959720.1| hypothetical protein NCU02400 [Neurospora crassa OR74A]
SMAC_08294	3	2	5	10	>ref|XP_959532.2| hypothetical protein NCU02404 [Neurospora crassa OR74A]
SMAC_08297	6		8	14	>ref|XP_959535.2| dihydrolipoyl dehydrogenase, mitochondrial precursor [Neurospora
SMAC_08321			2	2	>ref|XP_959438.1| hypothetical protein NCU02433 [Neurospora crassa OR74A]
SMAC_08323	15	5	4	24	>ref|XP_959440.1| histone H2B [Neurospora crassa OR74A]
SMAC_08329			2	2	>emb|CAD70818.1| conserved hypothetical protein [Neurospora crassa]
SMAC_08332			4	4	>ref|XP_959217.2| hypothetical protein NCU04674 [Neurospora crassa OR74A]
SMAC_08357	3			3	>ref|XP_959188.2| hypothetical protein NCU04645 [Neurospora crassa OR74A]
SMAC_08364	3		5	8	>ref|XP_960945.1| hypothetical protein NCU01388 [Neurospora crassa OR74A]
SMAC_08396	4			4	>emb|CBI58796.1| unnamed protein product [Sordaria macrospora]
SMAC_08401	2			2	>ref|XP_958407.1| cation-transporting ATPase 4 [Neurospora crassa OR74A]
SMAC_08433			2	2	>ref|XP_001905476.1| hypothetical protein [Podospora anserina S mat+]
SMAC_08441	5			5	>ref|XP_956054.1| hypothetical protein NCU03463 [Neurospora crassa OR74A]
SMAC_08461			2	2	>ref|XP_957869.1| hypothetical protein NCU10073 [Neurospora crassa OR74A]
SMAC_08468	7	7	16	30	>ref|XP_964068.1| hypothetical protein NCU09808 [Neurospora crassa OR74A]
SMAC_08474	2		3	5	>ref|XP_964074.1| hypothetical protein NCU09814 [Neurospora crassa OR74A]
SMAC_08483	2			2	>ref|XP_963926.2| hypothetical protein NCU09332 [Neurospora crassa OR74A]
SMAC_08484			2	2	>ref|XP_963925.1| protein HMF1 [Neurospora crassa OR74A]
SMAC_08522	10	3	3	16	>ref|XP_958309.1| hypothetical protein NCU09910 [Neurospora crassa OR74A]
SMAC_08545	14	4	8	26	>ref|XP_959880.1| eukaryotic translation initiation factor 3 subunit 6 [Neurospora
SMAC_08560			10	10	No hits found
SMAC_08577	3		2	5	>ref|XP_962098.1| dolichol-phosphate mannosyltransferase [Neurospora crassa OR74A]
SMAC_08598			2	2	>ref|XP_001227518.1| hypothetical protein CHGG_09591 [Chaetomium globosum CBS 148.51]
SMAC_08623	28	8	12	48	>ref|XP_958036.1| hypothetical protein NCU09450 [Neurospora crassa OR74A]
SMAC_08658	2	2	2	6	>ref|XP_958502.1| hypothetical protein NCU09283 [Neurospora crassa OR74A]
SMAC_08679	4			4	>emb|CAD70445.1| DNA-dependent RNA polymerase II RPB140 (RPB2) [Neurospora crassa]
SMAC_08713	5			5	>ref|XP_958926.1| fructose-2,6-bisphosphatase [Neurospora crassa OR74A]
SMAC_08733	26	6	13	45	>ref|XP_959939.1| phosphatidylinositol-4-phosphate 5-kinase its3 [Neurospora crassa
SMAC_08770	3		14	17	>ref|XP_956635.1| hypothetical protein NCU05137 [Neurospora crassa OR74A]
SMAC_08771	2			2	>ref|XP_956634.1| hypothetical protein NCU05136 [Neurospora crassa OR74A]
SMAC_08783	6			6	>ref|XP_959358.1| hypothetical protein NCU04910 [Neurospora crassa OR74A]
SMAC_08796	3			3	>ref|XP_963604.1| hypothetical protein NCU08743 [Neurospora crassa OR74A]
SMAC_08842	16	9	10	35	>ref|XP_957291.1| glycyl-tRNA synthetase 1 [Neurospora crassa OR74A]
SMAC_08843	4			4	>ref|XP_957292.1| hypothetical protein NCU00406 [Neurospora crassa OR74A]
SMAC_08845			2	2	>ref|XP_957296.1| eukaryotic peptide chain release factor subunit 1 [Neurospora
SMAC_08848	5		4	9	>ref|XP_957299.2| 60S ribosomal protein L2 [Neurospora crassa OR74A]
SMAC_08869	10	6	10	26	>ref|XP_956862.1| aldehyde dehydrogenase [Neurospora crassa OR74A]
SMAC_08874	3		3	6	>ref|XP_956712.1| hypothetical protein NCU03426 [Neurospora crassa OR74A]
SMAC_08879	4		5	9	>ref|XP_956601.1| nitrate reductase [Neurospora crassa OR74A]
SMAC_08900	63	48	65	176	>ref|XP_963366.1| heat shock 70 kDa protein [Neurospora crassa OR74A]
SMAC_08906	4		9	13	>ref|XP_963374.1| protein SEY1 [Neurospora crassa OR74A]
SMAC_08932			2	2	>ref|XP_959081.1| hypothetical protein NCU09171 [Neurospora crassa OR74A]
SMAC_08935	15		7	22	>ref|XP_959084.1| hypothetical protein NCU09174 [Neurospora crassa OR74A]
SMAC_08991			3	3	>ref|XP_959728.1| hypothetical protein NCU05753 [Neurospora crassa OR74A]
SMAC_09034	14	6	2	22	>ref|XP_959745.1| peroxidase/catalase 2 [Neurospora crassa OR74A]
SMAC_09041	25	9	11	45	>ref|XP_959113.2| glutamine synthetase [Neurospora crassa OR74A]
SMAC_09047			4	4	>ref|XP_962786.1| hypothetical protein NCU07659 [Neurospora crassa OR74A]
SMAC_09061			2	2	>ref|XP_964511.1| hypothetical protein NCU02152 [Neurospora crassa OR74A]
SMAC_09071	2			2	>gb|ACD01426.1| small GTPase RAC [Neurospora crassa]
SMAC_09107	3			3	>ref|XP_965223.2| hypothetical protein NCU08092 [Neurospora crassa OR74A]
SMAC_09126	8	4	5	17	>ref|XP_962166.2| glycogen phosphorylase [Neurospora crassa OR74A]
SMAC_09127	4	3	2	9	>ref|XP_962163.2| mitogen-activated protein kinase sty1 [Neurospora crassa OR74A]
SMAC_09128	3		3	6	>ref|XP_962162.2| hypothetical protein NCU07023 [Neurospora crassa OR74A]
SMAC_09155	5	3	16	24	>emb|CBI60094.1| unnamed protein product [Sordaria macrospora]
SMAC_09176	10	4		14	>ref|XP_958354.1| acetyl-CoA hydrolase [Neurospora crassa OR74A]
SMAC_09193	15	3	14	32	>ref|XP_959849.1| hypothetical protein NCU05858 [Neurospora crassa OR74A]
SMAC_09269			5	5	>ref|XP_962039.1| peroxisomal hydratase-dehydrogenase-epimerase [Neurospora crassa
SMAC_09295			3	3	>ref|XP_959841.2| hypothetical protein NCU05850 [Neurospora crassa OR74A]
SMAC_09305		2		2	>ref|XP_960124.1| hypothetical protein NCU09785 [Neurospora crassa OR74A]
SMAC_09309			3	3	>sp|D1ZRH0.1|PURA_SORMK RecName: Full=Adenylosuccinate synthetase; Short=AMPSase; Short=AdSS;
SMAC_09438	2			2	>ref|XP_001909023.1| hypothetical protein [Podospora anserina S mat+]
SMAC_09539	4	3	2	9	>ref|XP_960088.1| hypothetical protein NCU05828 [Neurospora crassa OR74A]
SMAC_09545	14	7	9	30	>ref|XP_960101.1| hypothetical protein NCU05841 [Neurospora crassa OR74A]
SMAC_09548	5		9	14	>ref|XP_960097.1| hypothetical protein NCU05837 [Neurospora crassa OR74A]
SMAC_09567	7	2	5	14	>ref|XP_963017.1| acetyl-CoA carboxylase [Neurospora crassa OR74A]
SMAC_09603	4		4	8	>ref|XP_959307.2| hypothetical protein NCU08217 [Neurospora crassa OR74A]
SMAC_09625	3			3	>ref|XP_960312.1| hypothetical protein NCU07129 [Neurospora crassa OR74A]
SMAC_09737	6	9	16	31	No hits found
SMAC_09788	8	10	8	26	>emb|CBI60094.1| unnamed protein product [Sordaria macrospora]
SMAC_09840	9	7	17	33	>ref|XP_960102.1| hypothetical protein NCU05842 [Neurospora crassa OR74A]
SMAC_12083			4	4	>ref|XP_957271.2| ATP synthase delta chain, mitochondrial precursor [Neurospora
SMAC_12092			3	3	>ref|XP_962125.1| hypothetical protein NCU07271 [Neurospora crassa OR74A]
SMAC_12102	4		3	7	>ref|XP_001909214.1| hypothetical protein [Podospora anserina S mat+]
SMAC_12120	2		2	4	>ref|XP_958560.1| hypothetical protein NCU09056 [Neurospora crassa OR74A]
SMAC_12585		3	9	12	>ref|XP_001728087.1| hypothetical protein NCU11369 [Neurospora crassa OR74A]
SMAC_12602	4		5	9	>ref|XP_001728298.1| hypothetical protein NCU10732 [Neurospora crassa OR74A]
